1 TITLE: Parallel and nonparallel genomic responses contribute to herbicide resistance in  
2 *Ipomoea purpurea*, a common agricultural weed

3  
4 Authors: Megan Van Etten<sup>1</sup>, Kristin M. Lee<sup>2</sup>, Shu-Mei Chang<sup>3</sup>, and Regina S. Baucom<sup>4\*</sup>

5  
6 Affiliations:

7 <sup>1</sup>Biology Department, Penn State-Scranton, Dunmore, PA 18512

8 <sup>2</sup>Department of Biological Sciences, Columbia University, New York, NY 10027

9 <sup>3</sup>Plant Biology Department, University of Georgia, Athens, GA 30602

10 <sup>4</sup>Department of Ecology and Evolutionary Biology, University of Michigan, Ann Arbor, MI 48109

11  
12 Corresponding author:

13 Regina S. Baucom

14 4034 Kraus Natural Science Building

15 Department of Ecology and Evolutionary Biology

16 University of Michigan

17 Ann Arbor, MI 48109

18 rsbaucom@umich.edu

19 Phone: (734) 649-8490

20  
21 Keywords: genomic constraints, resistance, human-mediated selection, parallel evolution

22  
23  
24  
25  
26  
27  
28  
29  
30  
31  
32  
33  
34  
35  
36  
37  
38  
39  
40  
41  
42  
43  
44

45  
46  
47  
48  
49  
50  
51  
52  
53  
54  
55  
56  
57  
58  
59  
60  
61  
62  
63  
64  
65  
66  
67  
68  
69  
70  
71  
72  
73  
74  
75  
76  
77  
78  
79  
80  
81  
82  
83  
84  
85  
86  
87  
88

**Abstract**

The repeated evolution of herbicide resistance has been cited as an example of genetic parallelism, wherein separate species or genetic lineages utilize the same genetic solution in response to selection. However, most studies that investigate the genetic basis of herbicide resistance examine the potential for changes in the protein targeted by the herbicide rather than considering genome-wide changes. We used a population genomics screen and targeted exome re-sequencing to uncover the potential genetic basis of glyphosate resistance in the common morning glory, *Ipomoea purpurea*, and to determine if genetic parallelism underlies the repeated evolution of resistance across replicate resistant populations. We found no evidence for changes in 5-enolpyruvylshikimate-3-phosphate synthase (*EPSPS*), glyphosate's target protein, that were associated with resistance, and instead identified five genomic regions that show evidence of selection. Within these regions, genes involved in herbicide detoxification--cytochrome P450s, ABC transporters, and glycosyltransferases--are enriched and exhibit signs of selective sweeps. One region under selection shows parallel changes across all assayed resistant populations whereas other regions exhibit signs of divergence. Thus, while it appears likely that the physiological mechanism of resistance in this species is likely the same among resistant populations, we find patterns of both similar and divergent selection across separate resistant populations at particular loci.

## 89 Introduction

90 The evolution of pesticide resistance is a key example of rapid evolutionary change in  
91 response to strong, human-mediated selection [1]. Due to the widespread use of insecticides  
92 and herbicides in agriculture, multiple resistant pest populations often exist across the  
93 landscape [2–4]. These repeated examples of resistance allow for questions about the level at  
94 which parallel adaptation occurs [5–7]—*e.g.*, are parallel resistant phenotypes in separate  
95 lineages due to parallel changes at the developmental, physiological, or genetic level? Herbicide  
96 resistant weeds in particular provide remarkable examples of evolutionary parallelism, since the  
97 same nucleotide change can lead to resistance among separate lineages and even separate  
98 species [1,8,9]. Further, these examples of ‘extreme parallelism’ are often broadly considered  
99 as evidence of genomic constraint [7,10], which is the idea that parallel phenotypic evolution  
100 occurs because there are a finite number of genetic solutions to the same, often novel,  
101 environmental pressure.

102  
103 Among herbicide resistant plants, the data that support the constraint hypothesis stems  
104 from sequence analysis of genes that are *a priori* known to produce the protein targeted by the  
105 herbicide (*i.e.*, cases of target site resistance, TSR [9]) rather than genome-wide sequence  
106 surveys such as population genomics scans or genetic mapping studies. As a result, we  
107 understand very little about the potential for parallel genetic responses that may occur across  
108 the genome beyond the potential for changes within the (most often) single genes responsible  
109 for TSR. This is problematic as many weed species exhibit non-target-site resistance (NTSR)  
110 [11], which is caused by any physiological mechanism that is not due to TSR. NTSR can include  
111 a range of mechanisms, from herbicide detoxification to transport differences to vacuole  
112 sequestration [11]. Intriguingly, some weed species show multiple NTSR mechanisms within a  
113 single lineage [2,12,13], and even evidence of both TSR and NTSR [2,14]. Because there are  
114 relatively few examples underscoring the genetic basis of NTSR in herbicide resistant plants, it  
115 is currently unclear how ubiquitously cases of herbicide resistance support the idea of extreme  
116 genetic parallelism.

117  
118 Previous research on the genetic basis of glyphosate resistance in crop weeds has  
119 focused largely on the potential for changes at the target site, the enzyme 5-  
120 enolpyruvylshikimate-3-phosphate synthase (*EPSPS*), which is a central component of the  
121 shikimate acid pathway in plants [15]. Conformational changes to the enzyme, due to mutations  
122 in the *EPSPS* locus, lead to target site resistance (TSR). There are also nontarget site  
123 resistance mechanisms responsible for glyphosate resistance in other weeds [11]; however,  
124 unlike the cases of resistance controlled by TSR, the genomic basis of NTSR to glyphosate has  
125 been characterized in very few species [16]. As a result, it is unknown if the same genetic basis  
126 underlies NTSR mechanisms across separate resistant populations. Thus, examining the  
127 genomic basis of resistance among replicated, resistant weed populations would provide an  
128 ideal study system to interrogate the hypothesis that genomic constraint underlies the parallel,  
129 repeated evolution of the resistance phenotype.

130  
131 *Ipomoea purpurea* is a common agricultural weed that shows both within- and among-  
132 population variation in the level of resistance to glyphosate, the active ingredient in the widely

133 used herbicide RoundUp: while some populations of this species across its range in the  
134 southeastern and Midwest United States exhibit high survival following herbicide application  
135 (high resistance), other populations exhibit low survival (high susceptibility) [4]. The pattern of  
136 resistance across populations suggests that resistance has evolved repeatedly, with highly  
137 susceptible populations interdigitated among resistant populations [4], and no evidence of  
138 isolation-by-distance across populations, as would be expected in the simple scenario wherein  
139 resistance evolved once and moved across the landscape *via* gene flow [4]. We have recently  
140 shown that neutral genetic diversity across these populations is negatively related to the level of  
141 resistance [17] and that additive genetic variation underlying resistance to glyphosate in *I.*  
142 *purpurea* responds to selection *via* the herbicide [18,19]. Additionally, there is evidence of a  
143 fitness cost associated with glyphosate resistance in the form of lower seed germination and  
144 smaller plant size [20]. Intriguingly, the resistant populations appear to vary in the expression of  
145 this cost -- some highly resistant populations exhibit low germination and others exhibit smaller  
146 size, on average, than susceptible populations [20]. These data suggest that perhaps the  
147 genetic basis of resistance, or the physiological mechanism underlying resistance, differs  
148 among resistant populations. However, the genetic basis of resistance across any population of  
149 this species is currently unknown.

150  
151 Our overarching goal is to determine if the same genetic basis is responsible for  
152 glyphosate resistance across separate populations of *I. purpurea* sampled from agricultural  
153 fields with a history of glyphosate exposure. We first evaluate the potential for sequence  
154 changes in the EPSPS locus and find there are no changes that correlate with resistance,  
155 providing evidence that target site resistance is not responsible for the resistance phenotype  
156 across populations. We then perform a population genomics screen to identify loci that exhibit  
157 signs of selection--thus putatively responsible for the resistance phenotype--and to determine if  
158 patterns of relatedness between resistant populations suggest a single or multiple origins of  
159 resistance. We follow up on this screen with exome resequencing of candidate resistance loci,  
160 and determine if populations share a similar haplotype structure, which would suggest that a  
161 similar genetic basis was responsible for resistance across the landscape. We find regions of  
162 the genome that show evidence of selection across resistant populations to contain genes  
163 responsible for herbicide detoxification. Additionally, patterns of haplotype sharing among  
164 populations suggests both parallel and nonparallel genomic responses underlie resistance  
165 among populations. Overall, our results suggest that evolutionary constraints can underlie  
166 herbicide adaptation, but that patterns of selection across the genome indicate the potential for  
167 both parallel and divergent responses.

168  
169  
170  
171  
172  
173  
174  
175  
176

177 **Results**

178

179 **No evidence for changes in glyphosate target enzyme (*EPSPS*)**

180 We sequenced two copies of *EPSPS* (copy A and B) from geographically separate  
181 populations of *I. purpurea* to determine if glyphosate resistance is due to a target-site resistance  
182 mechanism in this species as identified in other resistant species [21]. Individuals used for  
183 sequencing were sampled as seed from six highly resistant (R) (N=20, average survival at 1.7kg  
184 a.i./ha: 84%) and five susceptible (S) populations (N=25, average survival at 1.7kg a.i./ha: 26%;  
185 S1 Table) [4]. We found 14 (copy A) and 22 (copy B) variable sites across all populations but no  
186 copy exhibited SNPs in the region previously shown to cause resistance in other weed species  
187 (S1 Fig). Additionally, resistant and susceptible populations did not significantly differ in allele  
188 frequencies for any of these SNPs (copy A: chi-squared test,  $\chi^2$  range 0.02-0.33, min p-value =  
189 0.57; copy B: chi-squared test,  $\chi^2$  range 0.00-0.18, min p-value = 0.67; S1 Table) nor were any  
190 significantly correlated with resistance level (copy A: Pearson's correlation, coefficient range  
191 0.25-0.69, min p-value = 0.12; copy B: Pearson's correlation, coefficient range 0.15-0.72, min p-  
192 value = 0.17; S1 Table).

193

194 **Population structure suggests independent evolution of resistance**

195

196 We next examined measures of genetic relatedness to determine if separate resistant  
197 populations showed a pattern of high similarity, which would suggest that resistance alleles  
198 were shared between populations due to gene flow or from a common lineage. To do so, we  
199 used a modified RAD-seq approach (nextRAD) and genotyped 10 individuals sampled as seed  
200 from each of four resistant populations and four susceptible populations (average survival at  
201 1.7kg a.i./ha: 89% and 16%, respectively [4]; Fig 1A; Table 1). This resulted in 8,210 high-  
202 quality, variable SNP loci from 80 individuals. Population genetics parameters of the RADSeq  
203 SNPs, including expected and observed heterozygosity across populations are presented in the  
204 S2 Table. A neighbor joining tree calculated from pairwise relatedness showed that resistant  
205 populations did not cluster into a single group and are instead interspersed with the susceptible  
206 populations (S2 Fig). Additionally, a principal coordinates analysis (PCoA) using allele  
207 frequencies (Fig 1B) did not separate the populations into distinct resistant and susceptible  
208 groups, and a genetic structure analyses showed that resistant and susceptible populations did  
209 not segregate into two separate genetic clusters as would be expected if all resistant  
210 populations derived from the same initial population (S3 Fig).

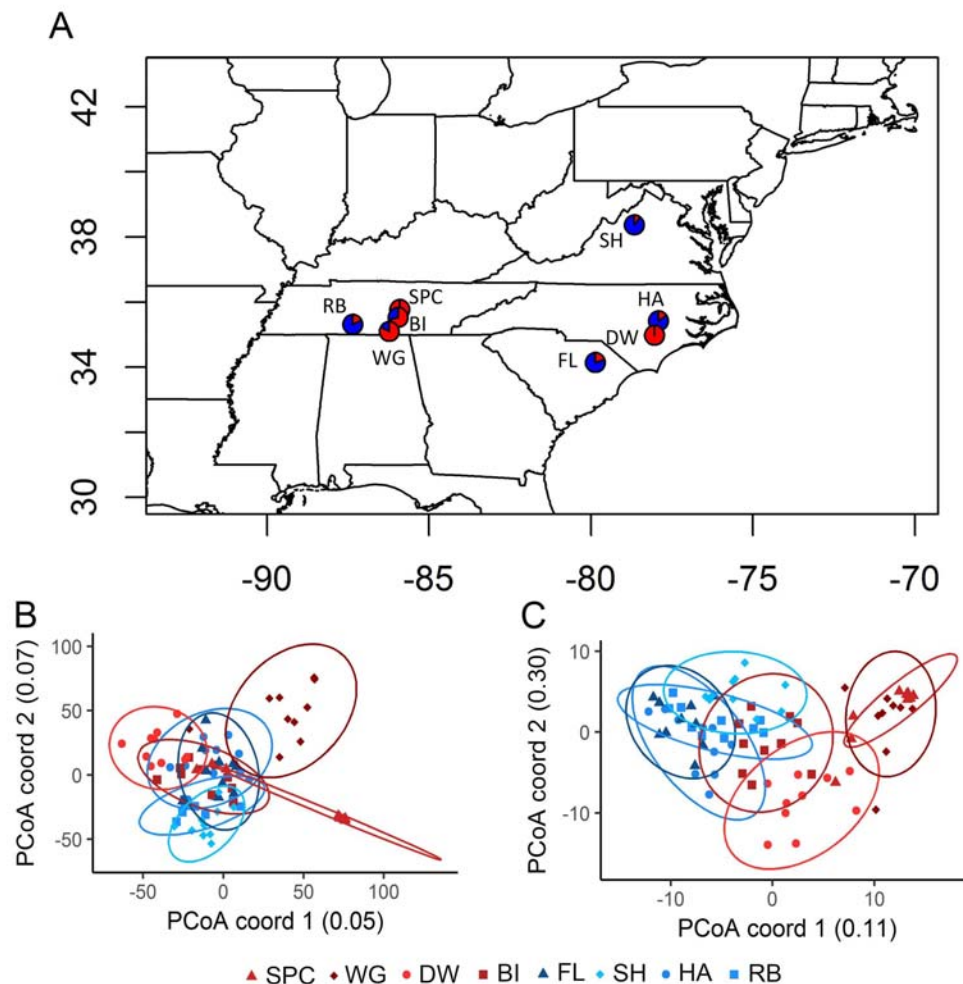

211  
212 **Fig. 1. Population locations and relationships among *I. purpurea* samples.** (A) Populations were  
213 sampled from locations in the southeast and ranged from 10% to 100% survival following glyphosate  
214 application (proportion of individuals that survived glyphosate treatment shown for each population,  
215 red=survived, blue=died). Individuals from resistant populations (>50% survival after treatment; red  
216 colored symbols) do not group together in a PCoA analysis (B) when using all of the RAD-seq SNP loci.  
217 Allele frequencies of outlier loci are presented in (C). Populations indicated in blue are highly susceptible  
218 whereas populations in red are resistant to glyphosate.

219

220

### 221 **Genome-wide scan indicates loci associated with resistance**

222 We next performed a genome-wide outlier screen to identify loci exhibiting signs of  
223 selection and thus potentially involved in glyphosate resistance in *I. purpurea*. We used two  
224 programs (BayeScan and bayenv2) to do so. BayeScan identified 42 loci that were outliers  
225 while bayenv2 identified 83 loci whose allele frequencies were correlated with the level of  
226 resistance (Dataset S1). Using GO assignments (Dataset S1), we found that the top three  
227 biological processes for the resistance outlier loci were proteolysis, protein phosphorylation, and  
228 regulation of transcription. Of special note, we identified a glycosyltransferase among the outlier

229 loci, which are genes shown to be involved in herbicide detoxification in other species  
230 [12,22,23].

231  
232 The identified resistance outliers showed twice the level of differentiation among the  
233 resistant populations (mean pairwise  $F_{ST}$ s of outliers = 0.327, 95% CI = 0.293-0.362) compared  
234 to the level of differentiation among susceptible populations (mean pairwise  $F_{ST}$ s of outliers =  
235 0.180, 95% CI = 0.146-0.216). This contrasted with genome-wide patterns of  $F_{ST}$  (*i.e.* pairwise  
236  $F_{ST}$  across all loci: resistant populations  $F_{ST}$  = 0.198 (0.192-0.203), susceptible populations  $F_{ST}$   
237 = 0.133 (0.128-0.137)). Further, the pattern was the same for outliers regardless of whether  
238 they were identified by BayeScan or bayenv2. This increased differentiation of outlier loci  
239 among resistant populations could be a result of drift, or could indicate that a different genetic  
240 basis underlies resistance across populations. Two resistant populations from central  
241 Tennessee (SPC and WG) exhibited significant overlap in allele frequencies of outlier loci (Fig  
242 1C), suggesting a similar response to selection between these two populations. On the other  
243 hand, the allele frequencies of outliers from BI, another highly resistant population from TN,  
244 clustered between the susceptible and other resistant populations whereas individuals from DW,  
245 a resistant population from North Carolina, exhibited some overlap with BI (Fig 1C).

246  
247 To insure that our resistance outliers from the RADseq analysis were associated with  
248 resistance rather than an environment that might co-vary with the level of resistance, we  
249 examined three other likely environmental variables in a separate bayenv2 analysis: minimum  
250 temperature of the coldest month, precipitation of the driest month, and elevation. We chose  
251 these specific climatic variables as other herbicide resistance studies have identified the  
252 influence of temperature and precipitation on the expression of resistance within a population  
253 [24–27]. While this tactic identified loci that were associated with environmental variables, very  
254 few of these loci overlapped with our identified resistance loci, indicating that the loci that are  
255 associated with resistance are not likely the result of selection by other environmental influences  
256 (S4 Fig).

257

### 258 **Exome re-sequencing identifies genomic regions associated with resistance**

259 We next performed target-capture re-sequencing of the genes located near (or  
260 containing) outlier SNPs identified by the population genomics screen. Using both a *de novo*  
261 genome and transcriptome assembly [28] (S3 Table), we designed probes to sequence the  
262 following: exons from predicted genes near outlier SNPs (171 genes), genes from a match of  
263 the outlier SNPs to the transcriptome (30 genes), the *EPSPS* genes (2), previously reported  
264 differentially expressed genes associated with resistance [28] (19 genes), and 214 randomly  
265 chosen transcriptome sequences to serve as a control (Dataset S1). We made target-enriched  
266 libraries for 5 individuals in each of the 8 populations (Fig 1A), which were then sequenced on  
267 an Illumina Hi-Seq 2000. Following sequencing, filtering, and contig assembly (see Methods) we  
268 ran outlier tests to identify SNPs exhibiting signs of selection. Of this set, BayeScan identified  
269 104 SNP outliers while bayenv2 identified 231 SNP outliers, 98 of which were shared between  
270 programs (Dataset S1). The majority of outliers were from the probes designed from the  
271 population genomics RAD-seq outliers (52%), followed by the non-probe contigs (*i.e.* off-target  
272 sequences; 37%), and a few from the control probes (11%). The majority of the outliers from

273 control probes (17/20) fell within genomic regions that we found to be enriched with outliers (see  
 274 below).

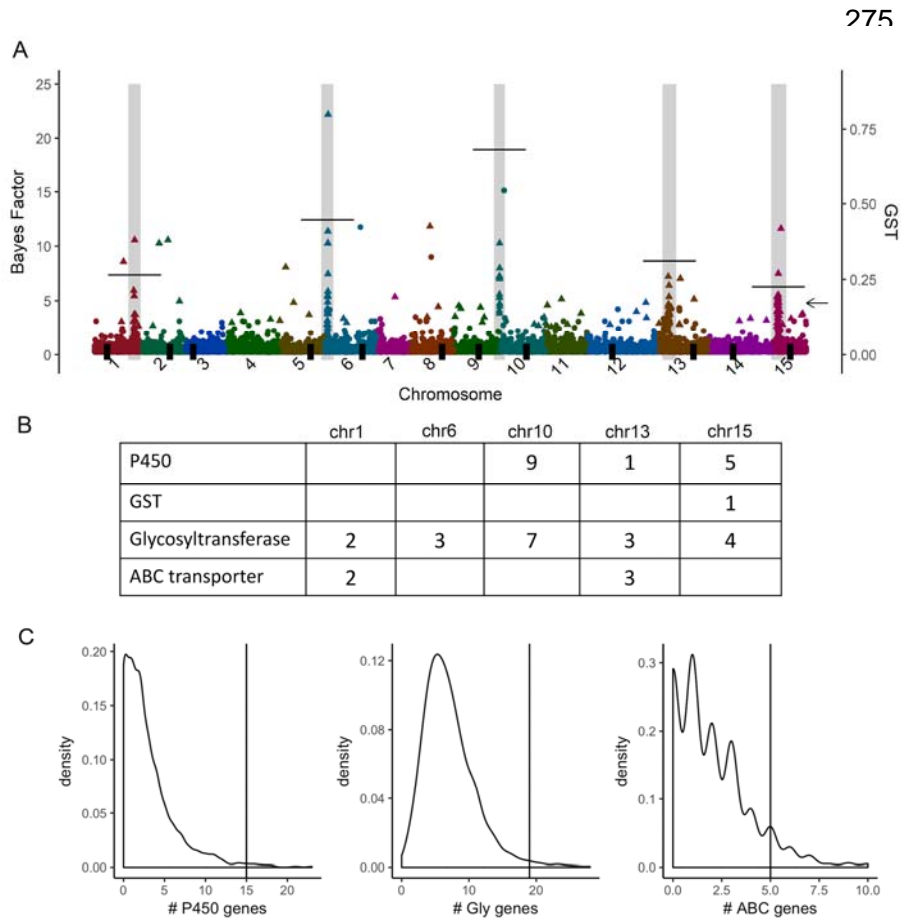

299

300 **Fig 2. Regions of the *I. purpurea* genome enriched with outlier loci.** (A) Aligning the denovo contigs  
 301 to the *I. nil* genome shows 5 regions enriched for outliers (regions in grey; symbol colors denote  
 302 chromosomes; symbol shape denotes significance). The majority of the outliers (71%) fall within the five  
 303 regions. Significant outliers, noted with triangles, exhibited the most extreme 1% Bayes Factors and the  
 304 5% most extreme Spearman correlation coefficients (left y-axis). The average GST (right y-axis) was  
 305 calculated per enriched region and is indicated by a thin horizontal line for each outlier enriched region  
 306 (arrow indicates average GST value over all SNPs). The position of each chromosome's centromere is  
 307 indicated by a thick black vertical line on the x-axis. (B) The five outlier-containing regions (chr1-chr15)  
 308 had multiple copies of several genes potentially involved in non-target site resistance (numbers indicate  
 309 the number of genes that fall into each category, P450 = cytochrome P450, GST = glutathione s-  
 310 transferase, Glycosyltransferase = glycosyltransferase, ABC transporter = ABC transporter). (C)  
 311 Resampling the *I. nil* genome 1000 times to generate an empirical distribution of gene copy number of  
 312 each type of gene indicates that the outlier enriched regions contain more of the potential herbicide  
 313 detoxification genes of interest than expected due to chance. Thin horizontal line indicates overall number  
 314 of each type of gene found within the outlier-enriched regions, which was greater than expected from the  
 315 empirical distribution for the cytochrome P450, glycosyltransferase, and ABC transporter genes ( $P <$   
 316 0.001).

317  
 318



319  
320  
321  
322  
323  
324  
325  
326  
327  
328  
329  
330  
331

We aligned the re-sequenced contigs onto the assembled genome of a close relative, *I. nil* [29], and identified five genomic locations that were enriched for outliers (Fig. 2A), with 149 (71%) of the outlier SNPs falling within these regions. The five regions ranged from 276 KB to 4 MB in size and together contained 945 predicted genes (based on *I. nil* gene annotations; Dataset S1). Some of the five regions contained outliers identified by both bayenv2 and BayeScan while others regions had outliers primarily identified by bayenv2 (% of outlier SNPs identified by both programs, chromosome 1: 6%; chromosome 6: 72%; chromosome 10: 100%; chromosome 13: 60%; chromosome 15: 36%). The outlier enriched regions were not located near or within the centromere for any chromosome (centromere indicated by thick vertical line on the x-axis, Fig 2A).

332  
333  
334  
335  
336  
337  
338  
339  
340  
341  
342

We identified multiple genes within the outlier enriched regions from four gene families of interest—the cytochrome P450s, ABC transporters, glycosyltransferases, and glutathione S-transferases (GST)—which are gene families hypothesized to be involved in non-target site resistance *via* herbicide detoxification (Fig 2B). Resampling 1000 times identified a significant over-representation of glycosyltransferase ( $P = 0.01$ ), ABC transporter ( $P = 0.05$ ), and cytochrome P450 ( $P = 0.01$ ) genes within the five enriched regions (Fig 2C), suggesting that these loci are potentially responsible for resistance in *I. purpurea* and were not identified solely due to their high copy number in plant genomes. In comparison, outlier SNPs that did not fall into the five outlier enriched regions (29% of SNPs) were less likely to be near genes from these four families (S5A-D Fig).

343  
344  
345  
346  
347  
348  
349  
350  
351  
352  
353  
354  
355

As expected based on the Bayescan results, the regions of each of the five chromosomes enriched with outliers exhibited high genetic differentiation between resistant and susceptible populations (average across genome is indicated by the arrow on Fig 2A; measured as  $G_{ST}$ , which is  $F_{ST}$  generalized to multiple alleles). Although all regions showed an average  $G_{ST} > 0.20$ , the enriched region on chromosome 10, spanning ~0.28MB, displayed the highest  $G_{ST}$  (chr 10 enriched region  $avg \pm SD$ :  $0.64 \pm 0.12$ , R vs S populations). Within this region, we found higher nucleotide diversity among susceptible compared to resistant individuals ( $\pi_S/\pi_R = 2.04$ ; a ratio more extreme than that found across 95% of the genome-wide SNP windows, Fig 3A; S6 Fig). In comparison, across other outlier enriched regions, nucleotide diversity was higher among resistant compared to susceptible individuals, but the difference between resistant and susceptible individuals exceeded the background genome-wide ratio only within the enriched region on chromosome 1 (Fig 3A).

356  
357  
358  
359  
360  
361  
362

The outlier enriched region on chromosome 10 likewise exhibited evidence of selection based on estimates of both Tajima's D (Fig 2B) and Fay and Wu's H (Fig 2C). Tajima's D, which is sensitive to a lack of low-frequency variants [30], exhibited a negative value among resistant individuals, although the most extreme values within this region ranged from -0.64 to -0.81 and did not exceed the 95% most extreme genome-wide values (Fig 2B). In comparison, Fay and Wu's H, which is sensitive to excess high-frequency derived variants compared to neutral expectations [31], was significantly more negative than the genome-wide value among resistant

363 individuals (-8.55; Fig 2C). Interestingly, values of Tajima's D and Fay and Wu's H were typically  
 364 positive and either greater than 2 (2.37, avg Tajima's D in region) or approaching 2 (1.59, avg  
 365 Fu and Way's H in region) among susceptible individuals, suggesting a pattern of balancing  
 366 selection within susceptible populations. The difference in both Tajima's D and Fu and Way's H  
 367 between resistant and susceptible individuals within two 25 SNP windows (positions 381983679

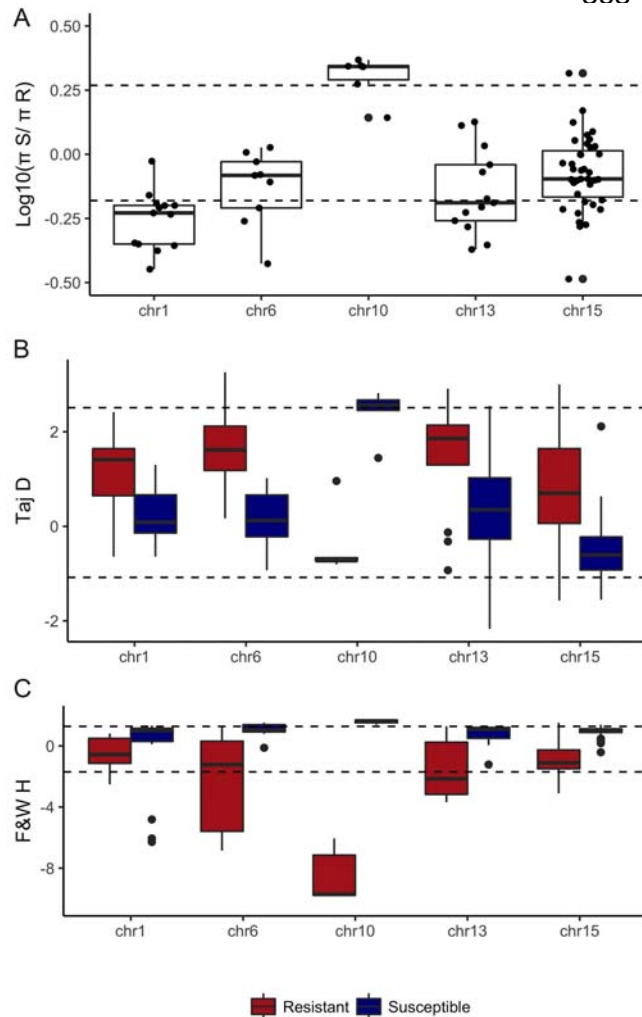

368 - 382012084) were more extreme than that  
 found across 99% of the genome-wide SNP  
 windows, potentially narrowing in to a ~28  
 kb region of strong selection within the  
 outlier enriched region of chromosome 10.  
 Finally, the enriched region on chromosome  
 13 exhibited negative values of Fu and  
 Way's H among resistant individuals (-1.58,  
 avg Fu and Way's H within region), with the  
 most extreme negative values ranging from  
 -2.15 to -3.68 over a contiguous region of

**Fig 3. Resistant individuals exhibit evidence of selective sweeps in outlier-enriched regions of genome.** (A) Nucleotide diversity (shown here as  $\log_{10} \pi_S/\pi_R$ ) is decreased in resistant individuals within the chr10 region compared to susceptible individuals, and (B) values of Tajima's D and (C) Fay and Wu's H across outlier enriched regions both suggest marks of positive selection in the chromosome 10 outlier enriched region, with some indication for positive selection in the outlier enriched region of chromosome 13. Dashed lines show the 95% most extreme genome-wide values for each metric.

1.49MB.

381

382  
 383 Given signs of positive selection on the outlier enriched regions of chromosome 10 and  
 384 (to a lesser extent) chromosome 13, we examined the genes found within these two regions in  
 385 greater detail. Within the outlier-enriched region of chromosome 10, we identified 7  
 386 glycosyltransferase and 9 cytochrome P450 genes, with the 7 glycosyltransferase genes found  
 387 tandemly repeated within a span of 42 kb (Fig 4A). Seventeen non-synonymous SNPs were  
 388 present across four of the glycosyltransferase genes (asterisks in Fig 4A). Within an 811 bp  
 389 segment of the conserved domain one of the glycosyltransferases, we identified a cluster of  
 390 seven non-synonymous SNPs with very low  $\pi$  values in resistant compared to susceptible  
 391 individuals (conserved domain average  $\pi_R = 0.18$ ;  $\pi_S = 0.43$ ). None of the non-synonymous  
 392 SNPs within this region were fixed within the resistant populations, but were very close to

393 fixation (allele 1, resistant freq = 0.1, susceptible freq = 0.7; allele 2, resistant freq = 0.9,  
394 susceptible freq = 0.3). Within the outlier-enriched region of chromosome 13, we identified a  
395 cytochrome P450 gene with 6 non-synonymous SNPs (shown with asterisks in Fig 4B), and a  
396 shared haplotype among three of the four resistant populations (Fig 4B).  
397  
398

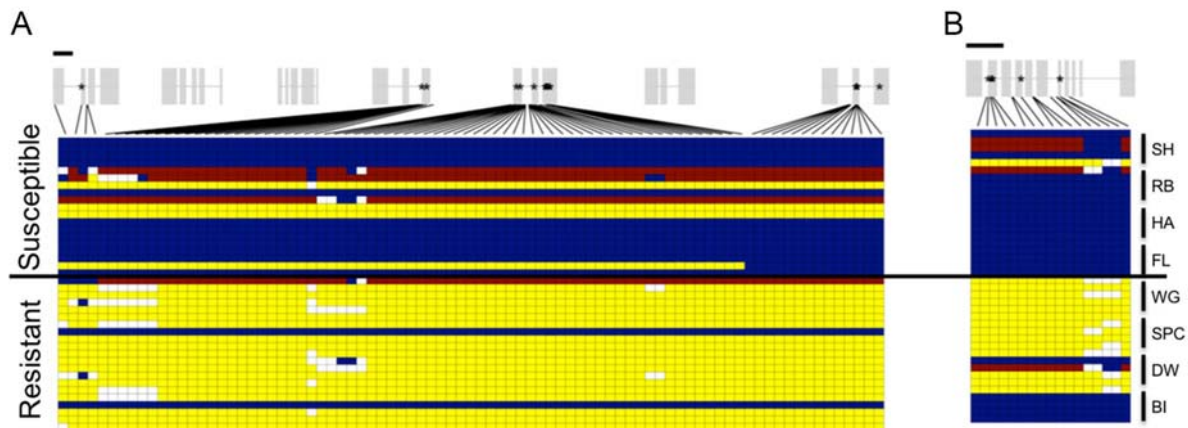

399  
400  
401 **Fig 4. Signs of selection across conserved haplotypes of herbicide detoxification genes.**  
402 Haplotypes are shown for each individual for the (A) seven duplicated glycosyltransferase genes on  
403 chromosome 10 (exons above in grey), and (B) an ABC transporter gene on chromosome 13. Blue and  
404 yellow indicate homozygotes, red indicates heterozygotes, white in missing data; stars indicate a non-  
405 synonymous change at that location. Black bar above gene models indicates 1kb.  
406

407 We likewise examined patterns of linkage disequilibrium across the outlier enriched  
408 regions of each of the five chromosomes, since linkage between SNPs would provide another  
409 line of evidence for a potential selective sweep indicating a response to selection. Additionally,  
410 we calculated linkage disequilibrium (LD) along the chromosome (for chrs 1, 6, 10, 13 and 15)  
411 to determine an expected background amount of linkage between SNPs and thus an idea of the  
412 efficacy of our RADseq followed by exome-resequencing approach for identifying the genetic  
413 basis of resistance among populations. Across each chromosome, we found the average  $r^2$   
414 values (the correlation coefficient between each SNP pair as our estimate of LD) to be low,  
415 ranging from 0.032-0.036 (S4 Table). Due to the granular nature of the data, we did not  
416 estimate linkage decay, but did examine the potential for linkage within 10 kb windows on  
417 average. These values were greater than the background LD, but still less than 0.1 (range  
418 0.038-0.078, S4 Table). In comparison to values of linkage across the entire chromosome, we  
419 found evidence of stronger linkage among SNPs within the outlier-enriched regions of  
420 chromosomes 1, 6, 10, 13 and 15 (range of average  $r^2$ , 0.12-0.23). Notably, the chromosome 10  
421 outlier-enriched region exhibited the highest  $r^2$  value (0.234, S5 Table). Because the outlier-  
422 enriched regions varied in length, thus complicating the comparison of LD between them, we  
423 qualitatively examined the length around each outlier enriched region with elevated LD, or  $r^2$   
424 values that were  $> 0.25$ . We found that each outlier enriched region exhibited  $r^2 > 0.25$  across

425 relatively large sequence lengths, which ranged from 84 kb to 3 MB across chromosomes (S5  
426 Table).

427

### 428 **Haplotype structure**

429 A goal of the present work was to determine if separate populations have responded in  
430 parallel at the genomic level to selection *via* herbicide application. We performed a visual  
431 examination of the haplotype structure among outlier-enriched regions in more depth with the  
432 idea that a similar haplotype among separate resistant populations would point to a shared  
433 genomic basis underlying at least some of the loci indicated in herbicide resistance and another  
434 indication of selection on those loci. We used hierarchical clustering for this examination of  
435 haplotype structure. Using each sequenced contig from the outlier-enriched regions (Chrs 1, 6,  
436 10, 13, and 15), we assigned individuals to one of two groups based on genetic distance—either  
437 the group that contained the majority of susceptible individuals from highly susceptible  
438 populations (hereafter the ‘S’ group) or the other group (hereafter the ‘R’ group). We found a  
439 high proportion of resistant individuals (>75%) across all four resistant populations (SPC, WG,  
440 DW, and BI) in the chromosome 10 outlier enriched region (Fig 5A), meaning that the majority of  
441 resistant individuals from these populations shared high levels of genetic similarity in this region.  
442 Likewise, a high proportion of resistant individuals exhibited high genetic similarity in the outlier  
443 enriched region on chromosome 6, but only in three of the four resistant populations (SPC, WG,  
444 and DW). In contrast, the enriched regions on chromosomes 1, 12 and 15 exhibited high  
445 proportions of resistant individuals for SPC and WG, but not BI and DW (Fig 5A).

446

447 Additionally, we examined patterns of pairwise genetic differentiation among resistant  
448 and susceptible populations of the outlier-enriched regions of each chromosome, with the  
449 general expectation that a higher pairwise  $F_{ST}$  between resistant populations, compared to  
450 susceptible populations, might indicate lack of gene flow and/or greater genetic differences  
451 between resistant populations within these regions. We calculated pairwise  $F_{ST}$  estimates [32]  
452 among the resistant populations and the susceptible populations separately for each SNP, and  
453 then compared the average pairwise  $F_{ST}$  of the resistant populations versus the susceptible  
454 populations within the 5 outlier enriched regions. Across chromosomes 1, 6, 13, and 15, we  
455 found higher pairwise  $F_{ST}$  among resistant populations compared to susceptible populations,  
456 indicating that resistant populations were more differentiated in these regions. On chromosome  
457 10, in comparison, we found no evidence of genetic differentiation among resistant populations,  
458 suggesting either strong selection on young standing genetic variation within this region among  
459 populations, or the potential that gene flow has recently occurred between them followed by  
460 subsequent recombination (Fig 5B).

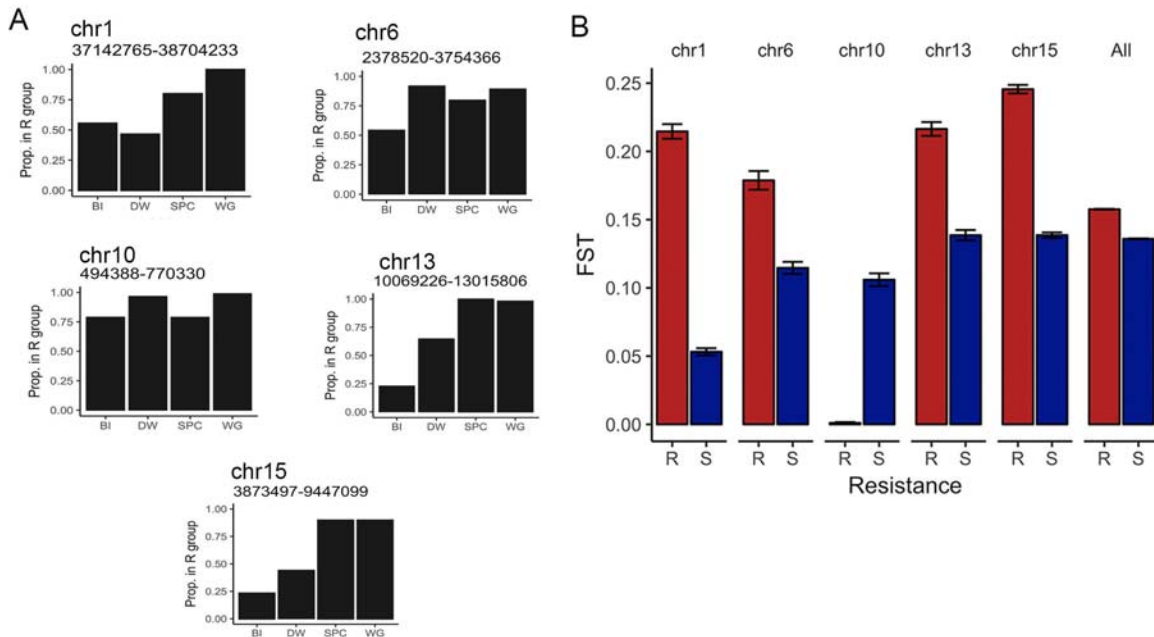

461  
 462 **Fig 5. Genetic similarity of haplotypes among resistant populations.** (A) The proportion of each  
 463 population that exhibited the resistant haplotype are shown for each population. Pairwise genetic distance  
 464 between each individual was calculated using all SNPs from each *I. purpurea* contig from the outlier-  
 465 enriched regions (length of contig used shown for each chromosome), and multidimensional scaling was  
 466 used to reduce the resultant genetic distance matrix to two dimensions. Populations were then  
 467 hierarchically clustered into two groups, with the group containing less than half of the individuals from the  
 468 susceptible populations considered the 'resistant' group. (B) The average pairwise genetic differentiation  
 469 for resistant (red) and susceptible (blue) populations. Pairwise  $F_{ST}$  values were calculated separately for  
 470 resistant and susceptible populations using contigs from each outlier enriched region of each  
 471 chromosome.

472  
 473 **Formal test of convergence**

474 Given multiple lines of evidence suggesting the region on chromosome 10 has  
 475 responded in parallel across the examined resistant populations (*i.e.*, an outlier enriched region  
 476 with high differentiation between resistant and susceptible populations, a similar haplotype  
 477 among resistant populations, marks of selection based on nucleotide diversity, Tajima's D, and  
 478 Fu and Way's H, and evidence for linkage between markers within the enriched region), we next  
 479 performed tests to examine the nature of convergence within this region. More specifically, we  
 480 sought to determine the most likely model for genomic convergence by determining whether  
 481 potential selected alleles within the region on chromosome 10 exhibited multiple independent  
 482 origins, were spread among populations *via* gene flow, or were shared among populations due  
 483 to ancestral standing variation. To do so, we applied the inference method of Lee and Coop  
 484 (2017), which builds on coalescent theory to show how shared hitchhiking events influence the  
 485 covariance structure of allele frequencies between populations at loci near the selected site.  
 486 Although our screens indicated multiple regions of the genome under selection, in this work we  
 487 focus formal tests of convergence only on the enriched region of chromosome 10 given the  
 488 evidence for a high proportion of individuals exhibiting the same haplotype. This pattern is  
 489 suggestive of a selective sweep that was shared among resistant populations, and one that was

490 due to selection on young standing, shared genetic variation, or due to migration between  
491 populations.

492  
493 We applied the inference method using 2248 SNPs from the ~276 KB region of the  
494 contig encompassing the outlier enriched regions on chromosome 10 to identify the locus under  
495 selection and to distinguish the most likely model of adaptation (independent, *de novo*  
496 mutations, migration, or selection on standing ancestral variation). From this analysis we find  
497 the migration and standing variation models to show similarly high log-likelihood ratios (Fig 6A).  
498 All three models peak at position 381,993,922 (based on the *I. nil* genome), indicating the most  
499 likely selected site. Notably, this position is within the two SNP windows that exhibited signs of  
500 selection from estimates of Tajima's D and Fu and Way's H (Fig 3). Further examination of the  
501 standing variant model at this position shows the parameters that result in the highest likelihood  
502 are very low standing allele frequency ( $g = 10^{-6}$ ) and very high selection ( $s = 1$ ), with the  
503 amount of time that the beneficial allele has been standing in the populations prior to selection,  
504 or  $t$ , estimated to be 5 generations (Fig 6B, C). This standing time is much smaller than the  
505 population split times (289K generations ago), so we assume migration in the model and the  
506 five generations are interpreted as the time between gene flow between populations and the  
507 onset of selection. We ran the model with a denser grid of  $t$  (0-10 generations) and found that  
508 the likelihood value was highest when  $t$  was equal to 0, indicating that the beneficial allele was  
509 immediately advantageous after introgressing and began sweeping rapidly within populations. In  
510 comparison, for the migration model, the parameters that result in the highest likelihood are a  
511 migration rate of 1 and high selection ( $s = 0.65$ ). Overall, our analyses of this region strongly  
512 supports a model where gene flow introduced the beneficial allele(s) into populations, which  
513 then began sweeping quickly and immediately. A rapid sweep like that proposed here would not  
514 allow for recombination to break down the haplotype introgressing along with the selected allele.  
515 This fits our expectations from the haplotype patterns above since there is high similarity  
516 between resistant populations over long stretches of this region.

517  
518

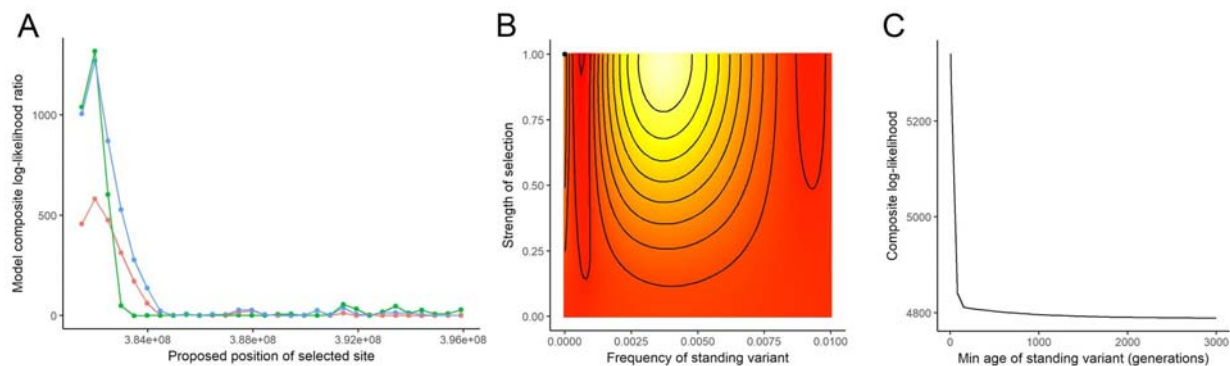

519  
520 **Fig 6. Test of convergence.** (A) Likelihood ratio of the following models relative to a neutral model with  
521 no selection: standing variant model (blue), migration (green) or independent mutation (red). (B)  
522 Likelihood surface for minimum frequency of the standing variant and the strength of selection holding the  
523 age of the standing variant constant; the point indicates the highest likelihood. (C) Likelihood surface for  
524 the minimum age of standing variant maximizing over the other parameters.

525

## 526 Discussion

527

528 In this work, we examined the evolution of glyphosate resistance across geographically  
529 separate populations of the common morning glory, *Ipomoea purpurea*. We set out to identify  
530 candidate loci involved in glyphosate resistance in this species and to determine if the pattern of  
531 selection on putative resistance loci was similar across highly resistant populations, which would  
532 indicate that populations responded in parallel to herbicide selection. Our results provide  
533 evidence that adaptation to glyphosate in *I. purpurea* is not due to a single gene, target-site  
534 resistance mechanism (TSR) as there are no nucleotide sequence differences in the target  
535 locus, *EPSPS*, that correlate with resistance. We found instead that at least five regions of the  
536 genome show evidence of selection and that these regions are significantly enriched for genes  
537 involved in herbicide detoxification. Further, we found evidence for a shared pattern of strong  
538 selection on one region of the genome among the four highly resistant populations  
539 (chromosome 10) whereas other regions under selection exhibited divergence between the  
540 resistant populations. These findings suggest that resistance in this species is due to a non-  
541 target genetic mechanism (NTSR), components of which exhibit signs of both parallel and non-  
542 parallel responses to selection among populations.

543

### 544 Genetic basis of glyphosate resistance in *I. purpurea*

545

546 *Ipomoea purpurea* is a noxious crop weed found in disturbed agricultural sites in the  
547 Southeastern and Midwest US. Our previous work examining the level of resistance among 47  
548 populations showed that resistance appeared on the landscape in a mosaic fashion, with highly  
549 resistant populations interdigitated among highly susceptible populations. This phenotypic  
550 pattern suggested resistance was independently evolving across populations [4]. Coalescent  
551 modelling using SSR marker variation supported a scenario of migration among populations  
552 prior to onset of glyphosate use (before 1974, when glyphosate was released commercially),  
553 rather than a scenario of migration *after* the introduction of the herbicide [4]. We thus  
554 hypothesized that resistance independently evolved among populations, and was most likely  
555 due to selection on standing and shared genetic variation [4]. However, we also found genetic  
556 differentiation among populations to be low ( $F_{ST} = 0.127$ ; [4]), and a more recent fine-scale  
557 analyses of their connectivity showed that although the majority of individuals were sired from  
558 within populations, three of the resistant populations included in this work (WG, SPC, and BI)  
559 shared recent migrants [33]. These findings support the idea that migration between populations  
560 could allow for the sharing of resistance alleles. Both of these scenarios--migration prior to the  
561 widespread use of the herbicide, or very recent migration--suggest that resistance is likely to be  
562 controlled by the same genetic basis across populations. Intriguingly however, we also  
563 previously showed that fitness costs were different among resistant populations, suggesting that  
564 the genetic basis of resistance could potentially be different [20]. Thus, we used a sequencing  
565 approach across highly resistant but broadly separated populations to investigate the genetic  
566 basis of resistance and to determine if patterns of selection and haplotype sharing indicated that  
567 the same genomic features were responding to herbicide selection among populations.

568

569 We found no evidence supporting target site resistance in *I. purpurea*--there were no  
570 variants within the *EPSPS* locus associated with resistance, and we found no evidence for  
571 selection on copies of *EPSPS* from the exome resequencing data. Using both RNAseq and  
572 rPCR, we previously showed that transcripts of *EPSPS* are not overexpressed in *I. purpurea*  
573 [28], providing evidence that resistance is not related to *EPSPS* overexpression, as has been  
574 shown in a variety of resistant species [34–38].

575  
576 Given the lack of structural or expression-related changes to the target-site locus,  
577 *EPSPS*, we combined a population genomics screen and exome resequencing to identify  
578 potential candidate loci underlying resistance. This strategy identified five candidate regions of  
579 the genome that were enriched with loci exhibiting signs of selection. The pattern of genomic  
580 differentiation within these five regions was greater than that of genome-wide, background  
581 differentiation--suggesting a response to herbicide selection. None of these regions were  
582 physically located near the centromere, which has been shown in other species to be areas of  
583 reduced recombination and thus high differentiation [39–42]. We identified the strongest  
584 evidence for positive selection associated with resistance within the outlier-enriched region on  
585 chromosome 10. In this region, we found reduced nucleotide diversity and a significant and  
586 negative  $F_u$  and  $W$ 's  $H$ , which is sensitive to a high frequency of derived variants. These  
587 patterns--high differentiation, reduced diversity, as well as the same haplotype among  
588 individuals from resistant populations--indicates that a hard selective sweep of this region  
589 occurred across the four resistant populations. It also strongly suggests that this region contains  
590 at least some of the loci underlying glyphosate resistance in *I. purpurea*.

591  
592 Intriguingly, we identified balancing selection among susceptible populations for this  
593 region on chromosome 10 (*i.e.*  $>2$  Tajima's  $D$  and  $F_u$  and  $W$ 's  $H$ ), which in this system would  
594 most likely be driven by crop rotations leading to herbicide on and off years, *i.e.*, a pattern of  
595 alternating selection [43]. Further, and opposite our expectations, we found higher nucleotide  
596 diversity among resistant individuals for the outlier enriched regions found on chromosomes 1  
597 and (to a lesser extent) 13. Such a pattern could be due to different loci responding to selection  
598 across resistant populations, or, and more likely, different haplotypes within resistant  
599 populations carrying the selected alleles. Unlike the dynamics we uncovered on chromosome  
600 10, which suggest a hard selective sweep, the pattern of selection on chromosomes 1 and 13  
601 are more aligned with a soft sweep model of evolution [43,44].

602  
603 Within the five genomic regions enriched with outlier loci, we identified genes involved in  
604 the herbicide detoxification pathway, suggesting that glyphosate resistance is caused by  
605 herbicide metabolism in *I. purpurea*. The herbicide detoxification pathway is hypothesized to  
606 occur in three phases [11,45]: 1) activation, which is generally performed by cytochrome P450s,  
607 2) conjugation, which is performed by GSTs or glycosyltransferases, and 3) transport into the  
608 vacuole, often by ABC transporters, which leads to the subsequent degradation of the herbicide.  
609 Multiple copies of each of these genes were present within the five outlier enriched regions.  
610 Within a 42.3 kb segment on chromosome 10, for example, we found seven duplicated,  
611 successive glycosyltransferase genes, with multiple non-synonymous SNPs present within the  
612 1st, 4th, 5th and 7th glycosyltransferase genes. In addition to being present on the enriched



613 region of chromosome 10, glycosyltransferases were also present within each of the other four  
614 outlier enriched regions. We likewise identified copies of ABC transporter and cytochrome P450  
615 genes in two and three regions exhibiting selection, respectively. Although detoxification genes  
616 have yet to be functionally verified for glyphosate resistance in any weed species, transcriptomic  
617 surveys have shown that at least some of the genes involved in herbicide detoxification are  
618 associated with glyphosate resistance [28,46–48]. Additionally, we have previously shown that a  
619 cytochrome P450 transcript was up-regulated in artificially selected glyphosate resistant  
620 lineages of *I. purpurea* [28], supporting the conclusion that detoxification is a likely mechanism  
621 underlying glyphosate resistance in this species.

622  
623 While our reduced representation population genomics and exome resequencing  
624 strategy has identified strong potential candidate genes associated with glyphosate resistance  
625 in *I. purpurea*, it is important to note that we found low levels of linkage disequilibrium between  
626 SNP markers (on average,  $r^2 \sim 0.03$  across chromosomes). This suggests our initial reduced  
627 representation screen, which influenced the target exons we chose for exome resequencing,  
628 likely missed portions of the genome responding to selection from the herbicide. It also  
629 suggests, however, that the positive associations we did uncover (especially with our exome  
630 resequencing data) are likely to be loci that are involved in resistance, or very tightly linked to  
631 loci involved with resistance. Importantly, linkage was strongly elevated across outlier enriched  
632 regions compared to background levels of linkage for each of the chromosomes. These areas of  
633 increased linkage (defined as  $r^2 > 0.25$ ) in each outlier enriched region ranged between 84 kb to  
634 3 MB in length, and support our findings of a genomic response to herbicide selection.

### 635 **Patterns of haplotype sharing across resistant populations suggests parallel and non-** 636 **parallel responses to selection** 637

638  
639 Our initial population genomics screen across a genome-wide panel of ~8K SNPs  
640 showed that resistant populations were not more related to one another than they were to  
641 susceptible populations, as would be expected under a scenario where resistance evolved in  
642 one lineage and moved *via* migration between locations. This, in addition to the ‘mosaic’  
643 appearance of resistance among populations suggested that selection on standing variation  
644 was responsible for the repeated appearance of resistance in this species across the  
645 landscape. Another likely scenario, however, is one where migration introduced beneficial  
646 allele(s) that introgressed into the local background and then rapidly increased in frequency  
647 when exposed to very strong selection. The region under selection on chromosome 10 appears  
648 to follow this scenario. We found an identical haplotype within this region in high frequency  
649 across the resistant populations (>75% of individuals within populations with the same  
650 haplotype), and our formal test of convergence identified a very short standing time of the  
651 variant within this region ( $t = 5$ ). Thus, the most likely model is one in which gene flow shared  
652 beneficial allele(s) between resistant populations which then started sweeping quickly and  
653 immediately, or within a few generations. This is likewise supported by our finding of low  
654 genome-wide patterns of linkage between SNPs, and evidence of a hard selective sweep, as  
655 indicated by low nucleotide diversity in this region and marks of positive selection indicating a  
656 high frequency of derived variants. Because this species employs a mixed mating system (*i.e.*,

657 multilocus outcrossing rate ( $t_m$ ) = 0.5; [49]), it is plausible that resistance alleles, once introduced  
658 into the population, could quickly spread *via* outcrossing and then increase in frequency given  
659 strong selection.

660  
661 Haplotypes from the other four outlier enriched regions were less consistently shared  
662 among the four highly resistant populations. The 'resistant' haplotype of the five outlier enriched  
663 regions were similar and in high frequency (>50%) in populations WG and SPC; genome-wide  
664 patterns of allele frequencies were also very similar between these two resistant populations  
665 (Fig 1C). This suggests that a highly similar resistant lineage is shared *via* migration between at  
666 least these two populations. The haplotypes of the other outlier enriched regions are in lower  
667 frequency among the other two resistant populations, BI and DW; further, pairwise  $F_{ST}$  values  
668 between resistant populations for the outlier enriched regions of chromosomes 1, 6, 13, and 15  
669 were higher than the values among susceptible populations. These findings suggest a couple of  
670 possibilities: the presence of multiple haplotypes across these regions that carry resistance loci  
671 (*i.e.* soft sweep model of evolution), or the potential that resistance in this species is mostly  
672 attributable to the region on chromosome 10 that is shared and highly similar among resistant  
673 populations, with signs of selection from the other regions attributable to other factors. In  
674 support of the latter explanation, studies from other species have suggested that changes to a  
675 single step in the detoxification pathway are enough to provide some level of resistance [16].  
676 However, coordinated upregulation of all of the genes from the detoxification pathway has been  
677 observed in grass species resistant to graminicide herbicides [50,51], suggesting that multiple  
678 components of this pathway are required for resistance. Unfortunately, there are few examples  
679 in which the genetic basis of NTSR resistance is known, making it difficult to draw conclusions  
680 on the importance of one gene versus the efforts of multiple genes in the detoxification pathway.

681  
682 Interestingly, it is hypothesized that rather than detoxify the herbicides *per se*, these  
683 detoxification genes enable the plant to survive the resulting oxidative stress after being  
684 exposed to herbicide, a mechanism that may allow for resistance to several different herbicides  
685 [11]. This explanation--*i.e.* the ability to handle oxidative stress--could potentially underlie  
686 glyphosate resistance in *I. purpurea*, and further examination will be required to differentiate  
687 between the direct detoxification of glyphosate or an adaptive ability to respond to oxidative  
688 stress. Our results here, combined with that of previous work, also suggests the possibility of a  
689 slightly different story--a single gene (or set of them; *i.e.* region on chromosome 10) is enough  
690 to gain resistance but further involvement of other genes in the same pathway may lead to lower  
691 fitness costs. Individuals from the resistant BI population from TN, for example, share only the  
692 haplotype found on chromosome 10 in common with the other resistant populations.  
693 Interestingly, BI exhibits a higher cost of resistance than SPC and WG (26.9% germination vs  
694 45.9% and 39.6%, respectively; [20]). This may indicate that loci specific to SPC and WG are  
695 important for ameliorating negative fitness costs of the changes in the chromosome 10 region.

## 696 697 **Conclusions**

698  
699 While there is strong evidence in support of genetic parallelism from cases of target-site  
700 resistance in other species [9,52], the genetic basis of non-target site resistance remains

701 uncharacterized in most weeds [52,53]. Thus, we do not have a clear idea of the genetic  
702 mechanisms responsible for non-target site resistance, nor do we know how often the same  
703 mechanism is responsible for non-target site resistance across resistant lineages of the same  
704 weed. Our approach of using genome-wide scans and exome resequencing is an important step  
705 in understanding which broad-scale genetic changes may be responsible for resistance in *I.*  
706 *purpurea*, and whether or not the same genomic features respond to selection among  
707 populations.

708  
709 Overall, our combined use of targeted sequencing, outlier analysis and exome re-  
710 sequencing provides a comprehensive view into the genomic basis of glyphosate resistance in a  
711 common and highly problematic agricultural weed. Our results suggest that genes responsible  
712 for herbicide detoxification are likely responsible for resistance in this species, with the important  
713 caveat that at this point we cannot determine if direct detoxification of the herbicide is occurring  
714 or if the species is able to respond to subsequent oxidative damage caused by the herbicide.  
715 Further, while we previously hypothesized that resistance across populations was due to  
716 selection on standing and shared genetic variation [4], the results we present here (stemming  
717 from the region on chromosome 10) support a scenario where gene flow between the resistant  
718 populations introduced the beneficial allele(s), followed by a hard selective sweep within a few  
719 generations. Finally, that we uncovered areas of genomic divergence among resistant  
720 populations within the regions showing signs of selection on chromosomes 1, 6, 13, and 15  
721 suggests either different mutations/loci are involved with detoxification across populations, or  
722 that multiple haplotypes carrying the same adaptive alleles are responding to herbicide  
723 selection.

724

725

## 726 **Materials and Methods**

727

### 728 **Seed collection and resistance phenotyping**

729 Seeds were collected from populations across the range of *I. purpurea* (Table 1). In each  
730 population, seeds were sampled from multiple maternal individuals separated by at least 2 m.  
731 These seeds were used in a previously reported resistance assay to determine levels of  
732 resistance at field suggested rates of glyphosate [4].

733

### 734 **EPSPS sequencing**

735 From the populations collected, we chose six high resistance (Avg. survival rate of populations,  
736 84%) and five low resistance populations (Avg. survival rate of populations, 26%) that spanned  
737 the range of the collection in the U.S [4]. For each population we grew 2-5 (Avg. 4.1) plants from  
738 different maternal families in the greenhouse. Leaf tissue from each individual was collected and  
739 immediately frozen in liquid nitrogen. mRNA was extracted using the Qiagen RNeasy Plant kit  
740 and cDNA was created using Roche's Transcriptor First Strand cDNA Synthesis Kit. Primers  
741 were designed based on *Convolvulus arvensis* EPSPS (GenBank: EU698030.1). These primers  
742 were used in a PCR to amplify the EPSPS coding regions using Qiagen's Taq PCR Master Mix  
743 kit, followed by cleaning using GE's Superfine Sephadex. Samples were then Sanger  
744 sequenced by the sequencing core at the University of Michigan. Bases were scored using

745 PHRED [54] followed by visual confirmation of heterozygous sites. Each of the copies of the  
746 *EPSPS* were aligned across all individuals using MafftWS [55] via Jalviewer [56] (Genbank:  
747 MK421977-MK422097). Variable sites were identified and used to obtain allele frequencies for  
748 the pool of resistant and susceptible populations separately. We used a  $\chi^2$  test to determine if  
749 allele frequencies varied between resistant and susceptible populations, and likewise  
750 determined if allele frequencies were correlated with population-level resistance values using  
751 Pearson's correlation. P-values were adjusted for multiple tests using the Benjamini and  
752 Hochberg [57] correction. We also calculated observed and expected heterozygosity using  
753 adegenet [58,59] and tested for Hardy-Weinberg equilibrium using 1000 bootstraps in pegas  
754 [60]. To compare to other known *EPSPS*, we downloaded several protein sequences from  
755 GenBank and aligned them to our translated amino acid sequences using tCoffee [61] in  
756 Jalview [56] (S1 Fig).

757

### 758 **SNP genotyping**

759 Eight populations were chosen to investigate non-target site resistance: 4 low resistance (Avg.  
760 survival rate, 16%) and 4 high resistance populations (Avg. survival rate, 89%) (Fig 1A; Table 1,  
761 data from [4]). Seeds from up to 10 maternal families per population were germinated and  
762 leaves were collected and frozen for DNA extractions. A total of 80 individuals were used for  
763 SNP genotyping.

764 DNA was extracted using a Qiagen Plant DNeasy kit. Genomic DNA was converted to  
765 nextRAD sequencing libraries (SNPsaurus). The nextRAD method for GBS (genotyping-by-  
766 sequencing) uses a selective PCR primer to amplify genomic loci consistently between  
767 samples; nextRAD sequences the DNA downstream of a short selective priming site. Genomic  
768 DNA (7 ng) from each sample was first fragmented using a partial Nextera reaction (Illumina,  
769 Inc), which also ligates short adapter sequences to the ends of the fragments. Fragmented DNA  
770 was then amplified using Phusion<sup>®</sup> Hot Start Flex DNA Polymerase (NEB), with one of the  
771 Nextera primers modified to extend eight nucleotides into the genomic DNA with the selective  
772 sequence TGCAGGAG. Thus, only fragments starting with a sequence that can be hybridized  
773 by the selective sequence of the primer were amplified by PCR. The 80 dual-indexed PCR-  
774 amplified samples were pooled and the resulting libraries were purified using Agencourt  
775 AMPure XP beads at 0.7x. The purified library was then size selected to 350-800 base pairs.  
776 Sequencing was performed using two runs of an Illumina NextSeq500 (Genomics Core Facility,  
777 University of Oregon). This resulted in 42,004,808,475 bp total, with an average of 525,060,106  
778 bp per individual (Genbank: XXXX).

779 To control for repetitive genomic material or off-target or error reads, coverage per locus  
780 was determined using reads from 16 individuals and loci with overly high or low read counts  
781 were removed (*i.e.* above 20,000 or below 100). The remaining reads were aligned to each  
782 other using BMap [62] with minid = 0.93 to identify alleles, with a single read instance chosen  
783 to represent the locus in a pseudo-reference. This resulted in 263,658 loci. All reads from each  
784 sample were then aligned to the pseudo-reference with BMap and converted to a vcf genotype  
785 table using Samtools.mpileup (filtering for nucleotides with a quality of 10 or better), and bcftools  
786 call [63]. The resulting vcf file was filtered using vcftools [64]. SNPs were removed if there was a  
787 minimum allele frequency less than 0.02, a read depth of 5 or less, an average of less than 20

788 high quality base calls or more than 20% of individuals exhibited missing data. This left 8,210  
789 SNPs.

790

### 791 **RAD-seq analysis**

792 Basic population genetic statistics ( $H_e$ ,  $H_o$ , and  $F_{IS}$ ) were calculated *via* poppr [65] and hierfstat  
793 [66] packages and can be found in S2 Table. fastStructure [67] was used to detect population  
794 structure (S2 Fig). A PCA analysis on individual allele frequencies was used to investigate  
795 structure using the dudi.pca function in the adegenet package [58,59] in R. Tassel was used to  
796 construct a neighbor-joining tree from pairwise relatedness [68]. Bootstraps of loci were  
797 conducted using a custom script, with 500 replications.

798 We used two outlier-based programs to identify potential loci under selection. We first  
799 used BayeScan (version 2.1, [69], which assumes an ancestral population from which each  
800 sampled population differs by a given genetic distance. Pairwise  $F_{ST}$  values are calculated  
801 between each sampled population and the ancestral population, thus correcting for differences  
802 in population structure. These  $F_{ST}$  values are then used in a logistic regression that includes a  
803 population specific factor (the structure across all loci) and a locus specific factor. If the locus-  
804 specific factor significantly improved the model, it implies that something abnormal is occurring,  
805 which is assumed to be natural selection. We used the default settings (false discovery rate of  
806 0.05) to identify loci that showed evidence of high  $F_{ST}$  between the resistant and susceptible  
807 populations.

808 The second program, bayenv2, identifies correlations between locus specific allele  
809 frequencies and an environmental variable [70,71]; in our work, the “environment” is the level of  
810 resistance per population. This program uses “neutral” loci to create a genetic correlation matrix  
811 against which each SNP is tested for a correlation between its frequency and the environment.  
812 In essence, the allele frequencies are modeled based on solely the neutral correlation matrix  
813 and with the addition of the environmental variable. Loci potentially under selection are then  
814 identified using the Bayes Factor (the support for the model with the environmental variable  
815 added) and the Spearman’s correlation coefficient. To estimate the “neutral” population  
816 structure, we removed any SNPs from sequences that aligned (*via* bowtie) with either the *I.*  
817 *purpurea* or *Lycium sp.* (from 1kp data, [72] transcriptome (only 35% of SNPs aligned to either)  
818 and then used the final matrix outputted from the correlation matrix estimation after 100,000  
819 iterations. All SNPs were then run with the environment being either -1 for the susceptible  
820 populations or 1 for the resistant populations, and a burn-in of 500,000 with a total of 5 runs was  
821 performed (correlation between runs was >0.80). Following Gunter & Coop [71], we identified  
822 outlier loci with the highest 1% of Bayes Factors and the 5% most extreme Spearman  
823 correlation coefficients averaged over the 5 runs.

824 We compared pairwise  $F_{ST}$ s for the resistant and susceptible populations using the full  
825 data set and the outlier data set using 4P [73]. We calculated Weir and Cockerham [32] pairwise  
826  $F_{ST}$  values for each data set (overall SNPs and outlier SNPs) for each pair of populations to  
827 calculate the average  $F_{ST}$  among resistant populations and susceptible populations. To obtain  
828 95% confidence intervals around these estimates, we performed the same steps on 1000  
829 randomly selected sets of loci (sampled with replacement).

830

### 831 ***De novo* genome assembly for exome resequencing**

832 We annotated RAD-seq outliers by using a BLASTN analysis to align them to a draft genome  
833 sequence from highly homozygous *I. purpurea* individual. To generate the draft genome  
834 sequence, DNA from a single individual was sequenced using PacBio (11 SMRT cells) and  
835 Illumina (2 lanes of 100 bp, paired end) sequencing (Genbank: XXXX). PacBio reads were  
836 filtered for adaptors and to remove low quality (<0.8) and short read lengths (<500 bp). Illumina  
837 reads were trimmed of low quality sequences using trimmomatic [74]. Illumina reads were  
838 assembled using ABYSS-PE k=64 [75]. This resulted in 1,933,851 contigs with lengths ranging  
839 from 64-94,907 bp (N50=6,790) for a total of 631,125,096 bp. LoRDEC [76] was used to error  
840 correct the PacBio sequences using the raw Illumina reads followed by trimming of weak  
841 regions. This resulted in 4,621,037 reads and 1,823,002,799 bp. These sequences were then  
842 combined with the Illumina assembled contigs using DBG2OLC (k=17, kmer coverage threshold  
843 = 2, min overlap = 10, adaptive threshold = 0.001, LD1=0) [77]. This resulted in 17,897 scaffolds  
844 with lengths ranging from 231-162047 bp (N50=15,425) for a total of 194,708,849 bp. This  
845 PacBio+Illumina assembly as well as the Illumina-alone assembly were used in a BLASTN  
846 analysis with each of the RAD-seq outliers. For those with genomic hits, putative genes on the  
847 contig were determined using AUGUSTUS [78], FGenesH [79], SNAP [80] and tRNAScan [81],  
848 which were used to design target capture probes.

849

#### 850 **Target capture exome re-sequencing**

851 We next designed probes for exome sequencing of loci that were either identified from our  
852 population genomics RAD-seq screen or loci have been shown to correlate with resistance in  
853 other species. We used a variety of methods to select possible capture probe sequences. First,  
854 we used a BLASTN [82] analysis to select transcripts matching our RAD-seq outliers - we  
855 BLASTed the 75 bp of the RAD-seq tags that contained outlier SNPs from either the BayeScan  
856 or bayenv2 analyses using the full dataset against transcripts in an *I. purpurea* transcriptome  
857 [28] and selected the top hit for each (30 transcripts, min e-value =  $3e-7$ ). Second, we selected  
858 transcripts that were previously identified as differentially expressed in an RNAseq experiment  
859 [28] which compared artificially selected resistant and susceptible lines following herbicide  
860 application (19 sequences). Third, we used the two EPSPS mRNA sequences (2 sequences).  
861 Fourth, we used a BLASTN analysis to select the putative genes on genomic contigs that  
862 matched our outlier SNPs. We BLASTed 75 bp of the RAD-seq tags that contained outlier SNPs  
863 to the two draft *I. purpurea* genomes described above and then selected the resulting coding  
864 sequences from the putative genes (171 sequences, min e-value= $7e-14$ ). Additionally, we  
865 randomly chose an even number of transcripts from the transcriptome to serve as our controls  
866 (214 sequences).

867 These 436 sequences were then used to design the capture probe candidates.

868 Candidate bait sequences were 120 nt long, with a 4x tiling density. Each bait candidate was  
869 BLASTed against the *I. trifida* genome [83], and a hybridization melting temperature ( $T_m$ )\* was  
870 estimated for each hit. Non-specific baits were filtered out (Additional candidates pass if they  
871 have at most 10 hits  $62.5 - 65^\circ\text{C}$  and 2 hits above  $65^\circ\text{C}$ , and fewer than 2 passing baits on  
872 each flank.) This led to 16,078 baits, with a total length of 580,421 nt.

873 To generate material for sequencing, five seeds from each of the 8 populations used in  
874 the previous population genomics screen (Fig 1A, Table 1) were grown in the greenhouse,  
875 leaves were collected, and DNA was extracted from young leaf tissue using a Qiagen DNeasy

876 Plant Mini kit. Genomic DNA was sent to MYcroarray for library preparation and target  
877 enrichment using the MYbaits (R) system. Genomic DNA was sonicated and bead-size-selected  
878 to roughly 300nt fragments, which was then used to create libraries using the Illumina (R)  
879 Truseq kit. A total of 6 cycles of library amplification using dual-indexing primers was applied,  
880 and index combinations were chosen to avoid potential sample misidentification due to jumping  
881 PCR during pooled post-capture amplification [84]. Pools of 3 or 4 libraries each were made,  
882 combining 200 or 150 nanograms of each library, respectively. These pools were then enriched  
883 with our custom MYbaits (R) panel (following the version 3.0 manual). After capture cleanup, the  
884 bead-bound library was amplified for 12 cycles using recommended parameters, and then  
885 purified with SPRI beads. These amplified, enriched library pools were combined in proportions  
886 approximating equimolar representation of each original library and sequenced on 2 lanes of  
887 Illumina 4k 150 PE. Our coverage goal was >30x depth per individual per locus. The resulting  
888 sequences were trimmed of adaptor sequences and low quality bases using cutadapt (q<10  
889 removed). On average we sequenced 11.6 million reads (min = 5.9 million, max = 13.8 million)  
890 for each individual (Genbank: XXXX).

891 We next assembled the sequenced reads into contigs to perform SNP calls. We used  
892 trimmed sequences from one individual and default settings in Megahit [85] to assemble  
893 reference contigs (24,524,768 reads assembled into 67,266 contigs; N50 = 458 bp; range 200-  
894 16167 bp; S3 Table). For each individual, trimmed sequences were aligned to the assembled  
895 contigs using bwa [86], and SNPs were called and then filtered using the GATK pipeline ([87-  
896 89]; overview of process: variants were initially called, individuals jointly genotyped, bases  
897 recalibrated based on filtered initial variants, and variants were recalled and jointly genotyped;  
898 specific commands: QD<2.0, FS>60, MQ<40, MQRankSum <12.5, RedPosRankSum<-8,  
899 minimum allele frequency >0.02, min mean depth > 5, max missing <0.8, min Q >20). After  
900 examining coverage per site, we found several contigs to have extremely high coverage and  
901 nearly 100% heterozygosity, suggesting multiple sequences were collapsed into 1 variant. Thus,  
902 we eliminated sites that had greater than 80% heterozygosity across individuals, or had more  
903 than twice the average coverage. This left 152,636 SNPs on 26,988 contigs for downstream  
904 analyses (N50 = 530; range 200-16167 bp). Bwa [86] was used to align the *de novo* contigs to  
905 the probes to estimate the percentage of SNPs that were from target capture probes. Fifty-one  
906 percent of these SNPs exhibited significant homology to one of the original probe sequences. In  
907 addition to analyzing these contigs, we also examined the contigs that did not exhibit significant  
908 homology to the probe sequences (hereafter non-probe contigs). The coverage for non-probe  
909 contigs was lower than that for probe contigs (23x average vs 33x), however because 13x  
910 coverage is sufficient to call heterozygous SNPs in a diploid [90] we chose to use both to  
911 increase our sampling of the genome. To annotate the contigs, we used a local TBLASTX  
912 analysis against Arabidopsis cDNA (from TAIR: [91]; e-value 0.001, and chose the sequence  
913 with the highest e-value for identification).

914

### 915 **Outlier analysis of targeted exome re-sequencing**

916 We used BayeScan and bayenv2 as above to identify putative adaptive loci from the targeted  
917 exome re-sequencing. To reduce the effect of linkage among loci, we randomly chose 1 SNP  
918 per 1000 bp using vcftools (27,225 SNPs retained). To estimate the neutral population structure

919 for bayenv2, 2000 contigs were randomly selected from contigs that did not map to the probes  
920 designed for the outliers.

921 To place the SNPs into a genomic context we aligned them to the *I. nil* [29] genome  
922 using BLAT [92] and liftover [93]. A total of 124,149 SNPs aligned to the genome. By visual  
923 analysis we identified five regions with a large majority of significant outliers (*i.e.* 71% of outlying  
924 SNPs). We delimited each of these 'enriched regions' by the first and last outlier of each region,  
925 and searched the regions for genes involved in non-target site resistance using the following  
926 GO terms and gene names: GO:0009635, GO:0006979, GO:0055114, glycosyltransferase,  
927 glutathione s-transferase, ABC transporters and cytochrome P450s. We randomly selected 5  
928 regions of the same size from the *I. nil* genome and counted the number of genes from the  
929 above gene families to determine if outlier enriched regions contained more of these genes of  
930 interest than expected due to chance. We repeated this 1000 times to create an empirical  
931 distribution, which was then used to determine the percentile of the observed data. We next  
932 determined if outliers outside of the enriched regions were more, less, or equally likely to be  
933 located near a gene family of interest (*i.e.*, glycosyltransferase, ABC transporter, etc). To do so,  
934 we counted the number of genes of each family within ~4MB (the largest of the 5 regions) from  
935 outliers found outside the five enriched regions and then compared the distributions of these  
936 outliers to those found within the enriched regions. We used CooVar [94] with the *I. nil* gene  
937 models to predict the protein level changes for each SNP that aligned to the *I. nil* genome and to  
938 determine if SNPs were from nonsynonymous or synonymous sites.

939 For estimates of genetic differentiation and diversity, we calculated  $G_{ST}$  [95], nucleotide  
940 diversity (as the ratio of susceptible to resistant individuals;  $\pi_S/\pi_R$ ), Tajima's D [30], and  $F_u$   
941 and Way's H [31] over 25 SNPs windows using customized scripts from [96]; 124,149 SNPs in  
942 analyses). Additionally, we used vcfTools to calculate pairwise  $F_{ST}$  estimates [32] among the  
943 resistant and susceptible populations separately for each SNP. Negative  $F_{ST}$  values will occur  
944 when there is little genetic variation, and thus we set any negative value to zero. We then  
945 compared the average pairwise  $F_{ST}$  of the resistant populations versus the susceptible  
946 populations within the 5 outlier enriched regions.

947 We used hierarchical modeling to determine if the resistant populations had similar  
948 haplotype structure in outlier containing regions of the genome, which would potentially indicate  
949 that resistance is controlled by the same genetic basis across populations. We grouped  
950 sequenced individuals into either those that exhibited the putative susceptible allele ('S' group)  
951 or the putative resistant allele ('R group') for each contig. To do so, the pairwise genetic  
952 distance between each individual was calculated based on all SNPs in each contig using the  
953 `dist.gene` command from the `ape` package (vers 5.0; [97]) in R [98]. This genetic distance matrix  
954 was reduced to 2 dimensions by multidimensional scaling using the `cmdscale` and `eclust`  
955 commands [99]. These two dimensions were then used to hierarchically cluster the populations  
956 into 2 groups using `kmeans` clustering. The group that contained less than half of the individuals  
957 from the susceptible populations was deemed the 'R' group (*i.e.* those that are genetically  
958 different from the majority of the susceptible individuals and presumably have the allele that aids  
959 in resistance).

960  
961 **Linkage**



962 We used the exome resequencing data to examine patterns of linkage across the genome and  
963 within the outlier-enriched regions. We estimated LD as the correlation coefficient ( $r^2$ ) between  
964 each SNP pair using the program GUS-LD (genotyping uncertainty with sequencing data-  
965 linkage disequilibrium; [100]), a likelihood method developed to estimate pairwise LD using low-  
966 coverage sequencing data. GUS-LD controls for under-called heterozygous genotypes and  
967 sequencing errors, which are a known problem with reduced representation sequencing. We  
968 estimated LD for each chromosome that exhibited an outlier enriched region (chr1, chr6, chr10,  
969 chr13, chr15) using the SNPs identified across all individuals using the exome resequencing  
970 dataset. We used only biallelic SNPs of at least 2% frequency and with <20% missing genotype  
971 calls since rare alleles can influence the variance of LD estimates. Only SNPs that could be  
972 aligned to the *I. nil* genome were used in the analysis, and we used the reduced SNP dataset (1  
973 SNP/kb) to reduce processing time (~10K SNPs used overall). The number of SNPs used per  
974 chromosome ranged from 1189 to 3191 and are presented in S5 Table. Linkage decay was not  
975 estimated due to the granular nature of the data; instead, we report  $r^2$  values averaged over the  
976 entire chromosome as a background estimate of LD, along with the 3rd quartile of  $r^2$  values, and  
977 the average of  $r^2$  values of SNPs located within 10 kb of one another.

978

### 979 **Test of convergence**

980 Given evidence that the outlier-containing region on chromosome 10 showed the strongest sign  
981 of differentiation between the resistant and susceptible populations (see Results), we applied  
982 the inference method of Lee and Coop (2017) to examine the most likely mode of adaptation  
983 within this region. This composite likelihood based approach, explained in full in [101] both  
984 identifies loci involved in convergence and distinguishes between alternate modes of  
985 adaptation--whether adaptation is due to multiple independent origins, if adaptive loci were  
986 spread among populations *via* gene flow, or were shared among populations due to selection on  
987 standing ancestral variation. We first estimated an F matrix to account for population structure  
988 using SNPs from scaffolds on Chr 3, 7, and 14 that showed no evidence of selection from our  
989 outlier analyses (S6 Table). We then used all SNPs (N = 2248) on a scaffold from the *I.*  
990 *purpurea* assembly (that aligned to *I. nil* scaffold BDFN01001043) to apply the inference  
991 framework to the region on chromosome 10 that exhibited signs of selection. We estimated the  
992 maximum composite likelihood over a grid of parameters used to specify these models (S7  
993 Table). We allowed two of the resistant populations (WG and SPC) to be sources of the variant  
994 in the migration model. Additionally, and following [101], we used an  $N_e = 7.5 \times 10^5$ .

995

996

### 997 **Functional annotation of nontarget site resistance genes**

998 To predict the putative function of genes within the five enriched regions, we used a BLASTN  
999 analysis to generate a network graph of each of our target gene families (cytochrome P450s  
1000 [102], glycosyltransferases [103], and ABC transporters [104]) based on homology to  
1001 *Arabidopsis thaliana* genes. We used the *I. nil* genes from the outlier regions and all *A. thaliana*  
1002 genes from each gene family in an all-by-all BLASTN, with an e-value =  $1^{-10}$  for the cytochrome  
1003 P450s and ABC transporters. For the glycosyltransferases, we first used a conserved domain  
1004 search to identify glycosyltransferase genes in the 5 outlier-enriched regions and used these in  
1005 the BLASTN search, with an e-value cutoff of  $1^{-1}$  due to very low conservation among genes

1006 within this family, a widely-recognized problem [105]. The resulting bit-score of the BLASTN  
1007 analysis were then used in cytoscape [106] to visualize the relationships, with colors denoting  
1008 the families (P450s and ABC transporters) or conserved coding domains (glycosyltransferases).

1009  
1010  
1011  
1012  
1013  
1014  
1015  
1016  
1017  
1018  
1019  
1020  
1021  
1022  
1023  
1024  
1025  
1026  
1027  
1028  
1029  
1030  
1031  
1032  
1033  
1034  
1035  
1036  
1037  
1038  
1039  
1040  
1041  
1042  
1043  
1044  
1045  
1046  
1047  
1048  
1049  
1050  
1051  
1052

1053 **Table 1.** Population information for each population used in the study. Pop number = population number  
 1054 as used in other studies resulting from this seed collection, Resistance type = classification of resistance  
 1055 in the population R >0.5 prop. survival S<0.5 prop. Survival, Pop Abbrev. = abbreviation for each  
 1056 population as used in other studies, State = state where seeds were collected, Proportion survival at 1.7 =  
 1057 proportion of individuals that survived a spray rate of 1.7 kg/ha of glyphosate based on Kuester et al  
 1058 2014, Latitude and Longitude = location where seeds were collected, Used for = abbreviation for which  
 1059 part of the study each population was used for E=EPSPS sequencing P=population genetics.  
 1060

| Pop number | Resistance type | Pop Abbrev. | State | Proportion survival at 1.7 | Latitude  | Longitude  | Used for |
|------------|-----------------|-------------|-------|----------------------------|-----------|------------|----------|
| 42         | S               | SH4         | VA    | 0.1                        | 38.373523 | -78.662516 | E,P      |
| 4          | S               | CR          | NC    | 0.21                       | 34.556672 | -79.125602 | E        |
| 36         | S               | IN12        | IN    | 0.25                       | 40.565608 | -85.503826 | E        |
| 17         | S               | MA1         | SC    | 0.25                       | 34.159155 | -79.272908 | E        |
| 23         | S               | SN          | TN    | 0.5                        | 35.067905 | -86.62955  | E        |
| 19         | R               | MC          | NC    | 0.67                       | 34.508193 | -78.70899  | E        |
| 5          | R               | CL1         | SC    | 0.73                       | 33.859875 | -79.909072 | E        |
| 43         | R               | VA2         | VA    | 0.82                       | 36.886448 | -78.553156 | E        |
| 32         | R               | WG          | TN    | 0.83                       | 35.099356 | -86.225509 | E,P      |
| 1          | R               | BI          | TN    | 1                          | 35.775237 | -85.903419 | E,P      |
| 10         | R               | DW          | NC    | 1                          | 34.983161 | -78.039309 | E,P      |
| 48         | S               | RB          | TN    | 0.18                       | 35.31653  | -87.35373  | P        |
| 14         | S               | HA          | NC    | 0.15                       | 35.424763 | -77.917121 | P        |
| 12         | S               | FL          | SC    | 0.20                       | 34.145812 | -79.865313 | P        |
| 51         | R               | SPC         | TN    | 0.71                       | 35.533413 | -85.951902 | P        |

1061

1062 **Accession numbers**

1063 *EPSPS* sequencing data (MK421977-MK422097), NextRAD sequencing data (XXXX), genome  
1064 assembly (XXXX) and Exome resequencing data (XXXX) are available in GenBank.

1065  
1066 **Supporting Information**

1067 **S1 Fig. No sequence differences in *EPSPS*.** Comparison of amino acid sequences of *Ipomoea*  
1068 *purpurea* *EPSPS* protein sequence (bottom two sequences) with other reported *EPSPS* proteins in the  
1069 NCBI database (gi|170783792, gi|76782198, gi|15225450, gi|257228989, gi|16751569, gi|460388790,  
1070 gi|225454012, gi|374923051, gi|46095337, gi|189170087) shows no sequence variation within the region  
1071 known to affect herbicide resistance (inside red outline). Non-synonymous changes (red and blue arrows)  
1072 outside of this region likewise do not correlate with resistance (Table S1).

1073  
1074 **S2 Fig. Neighbor joining tree using all of the RAD-seq SNP loci.** On the tree, populations are denoted  
1075 by color and tip labels; values at nodes are percent bootstrap support; population level resistance is  
1076 denoted by the color in the column (red=resistant, blue=susceptible).

1077  
1078 **S3 Fig. Population structure analyses.** At K=2 FastStructure results for the RADseq data do not show  
1079 the resistant populations (first four populations on the left) segregating into a distinct group, suggesting  
1080 they are not from a single origin. FastStructure analysis suggests either K=6 or K=7 as the best model,  
1081 both of which leads to some populations being highly admixed (e.g. BI) while others are fairly  
1082 homogenous (e.g. SH).

1083  
1084 **S4 Fig. RADseq outliers associated with environmental variables.** Based on bayenv2 analyses using  
1085 environmental variables, we identified 50 loci that correlated with minimum temperature of coldest month,  
1086 only 2 of which overlapped with the resistance outliers; 27 loci correlated with precipitation of the driest  
1087 month, 0 of which overlapped with the resistance outliers; 36 loci correlated with elevation, 0 of which  
1088 overlapped with the resistance outliers.

1089  
1090 **S5 Fig. Differences between outliers inside and outside of outlier enriched regions.** (A-D)  
1091 Distributions of the number of genes within 4 mb of an outlier, either inside (blue) or outside (red) an  
1092 outlier-enriched region. For each type of gene, the outliers outside of the regions show a left-skewed  
1093 distribution indicating fewer close detoxification genes for (A) ABC transporters, (B) Glycosyltransferases,  
1094 (C) Cytochrome P450s and (D) Glutathione S-transferases. (E) Outliers outside of the regions have lower  
1095 frequencies of the resistant haplotype than those inside the regions, suggesting they are more population  
1096 specific.

1097  
1098 **S6 Fig. Nucleotide diversity across all SNPs that aligned to the *I. nil* genome.** Data are shown are  
1099 the ratio of susceptible to resistant individual nucleotide diversity. Grey bars indicate the outlier enriched  
1100 regions identified on chromosomes 1, 6, 10, 13, and 15. Dashed lines show the 5% most extreme  
1101 genome-wide values.

1102  
1103 **S1 Table. *EPSPS* SNP data for gene copy A and B.** SNP #=the location of the SNP after alignment with  
1104 *EPSPS* from *Convolvulus arvensis*, Ho=observed heterozygosity (across all samples), He=expected  
1105 heterozygosity, HWE p-value=p-value for test of Hardy-Weinberg equilibrium from permutation test,  
1106 Alleles=SNP alleles, Syn=whether a synonymous change (as determined by alignment with *C. arvensis*  
1107 sequence), P-value chi-squared R vs S=p-value for test of allele frequency difference between resistant  
1108 and susceptible populations, P-value cor with resistance=adjusted p-value for correlation with survival.

1109

1110 **S2 Table.** Population genetics parameters for the RADseq SNPs. Population = population abbreviation.  
1111 Ave N/locus = average number of individuals with high quality allele data per locus. % loci missing =  
1112 average percent of the population with missing data per locus. Ho = observed heterozygosity. He =  
1113 expected heterozygosity. FIS = Wright's inbreeding coefficient.

1114  
1115 **S3 Table.** Assembly statistics for the Illumina genome assembly (using ABYSS-PE), the PacBio +  
1116 Illumina genome assembly (using DBLOG2), the resequencing assembly (using Megahit) and the  
1117 resequencing assembly contigs containing SNPs.

1118  
1119 **S4 Table.** Summary of SNPs used in the analysis of linkage disequilibrium. Only SNPs that could be  
1120 mapped to the genome of the close relative, *I. nil*, were used in analyses.  $r^2$  values were determined  
1121 using all individuals regardless of population or resistance level.

1122  
1123 **S5 Table.** Summary of SNPs used in the analysis of linkage disequilibrium.

1124  
1125 **S6 Table.** Neutral F matrix from scaffolds on chromosomes 3, 7, and 14 (61 scaffolds total). BI, DW,  
1126 SPC, and WG are the high resistance populations.

1127  
1128 **S7 Table.** Parameter spaces for composite-likelihood calculations for the standing variation (s, t, g) and  
1129 migration (s, m, source population) model simulations.

1130  
1131 **S1 Dataset:** Tables include annotations of outlier RADseq loci, annotations of probe sequences used for  
1132 target capture probes, annotation of outlier contigs from resequencing, a list of *I. nil* genes within the 5  
1133 outlier enriched regions.

1134

### 1135 **Acknowledgements**

1136 We thank A. Kuester for seed collection, A. Wilson for assistance with lab work, M.C. Hwang for  
1137 assistance with initial genome assembly, E. Schold for assistance with EPSPS sequencing, and  
1138 S.D. Smith, G. Coop, M. Hahn, and J. Ross-Ibarra for providing comments on an earlier version  
1139 of this work. MVE, S-MC and RSB were supported by USDA XXX, and KL was supported by  
1140 NIH XXX.

1141

### 1142 **Author contributions**

1143 Conceptualization: ME Van Etten, RS Baucom

1144 Data curation: ME Van Etten

1145 Formal analysis: ME Van Etten, RS Baucom, KM Lee

1146 Funding acquisition: RS Baucom, S-M Chang

1147 Investigation: ME Van Etten, RS Baucom, KM Lee

1148 Methodology: ME Van Etten, RS Baucom, KM Lee

1149 Supervision: RS Baucom

1150 Visualization: ME Van Etten, RS Baucom

1151 Writing -- original draft: ME Van Etten, KM Lee, S-M Chang, RS Baucom

1152

1153

1154

1155

1156

1157 **References**

- 1158 1. Powles SB, Yu Q. Evolution in action: plants resistant to herbicides. *Annu Rev Plant Biol.*  
1159 2010;61: 317–347.
- 1160 2. Délye C, Michel S, Bérard A, Chauvel B, Brunel D, Guillemain J-P, et al. Geographical  
1161 variation in resistance to acetyl-coenzyme A carboxylase-inhibiting herbicides across the  
1162 range of the arable weed *Alopecurus myosuroides* (black-grass). *New Phytol.* Blackwell  
1163 Publishing Ltd; 2010;186: 1005–1017.
- 1164 3. Thomsen EK, Strode C, Hemmings K, Hughes AJ, Chanda E, Musapa M, et al.  
1165 Underpinning sustainable vector control through informed insecticide resistance  
1166 management. *PLoS One.* 2014;9: e99822.
- 1167 4. Kuester A, Chang S-M, Baucom RS. The geographic mosaic of herbicide resistance  
1168 evolution in the common morning glory, *Ipomoea purpurea*: Evidence for resistance  
1169 hotspots and low genetic differentiation across the landscape. *Evol Appl.* 2015;8: 821–833.
- 1170 5. Christin P-A, Weinreich DM, Besnard G. Causes and evolutionary significance of genetic  
1171 convergence. *Trends Genet.* 2010;26: 400–405.
- 1172 6. Storz JF. Causes of molecular convergence and parallelism in protein evolution. *Nat Rev*  
1173 *Genet.* 2016;17: 239–250.
- 1174 7. Losos JB. Convergence, adaptation, and constraint. *Evolution.* 2011;65: 1827–1840.
- 1175 8. Martin A, Orgogozo V. The loci of repeated evolution: a catalog of genetic hotspots of  
1176 phenotypic variation. *Evolution.* 2013;67: 1235–1250.
- 1177 9. Baucom RS. The remarkable repeated evolution of herbicide resistance. *Am J Bot.*  
1178 2016;103: 181–183.
- 1179 10. Wake DB. Homoplasy: the result of natural selection, or evidence of design limitations? *Am*  
1180 *Nat.* 1991;138: 543–567.
- 1181 11. Délye C. Unravelling the genetic bases of non-target-site-based resistance (NTSR) to  
1182 herbicides: a major challenge for weed science in the forthcoming decade. *Pest Manag Sci.*  
1183 Wiley Online Library; 2013;69: 176–187.
- 1184 12. Brazier M, Cole DJ, Edwards R. O-Glucosyltransferase activities toward phenolic natural  
1185 products and xenobiotics in wheat and herbicide-resistant and herbicide-susceptible black-  
1186 grass (*Alopecurus myosuroides*). *Phytochemistry.* 2002;59: 149–156.
- 1187 13. Yu Q, Cairns A, Powles S. Glyphosate, paraquat and ACCase multiple herbicide resistance  
1188 evolved in a *Lolium rigidum* biotype. *Planta.* 2007;225: 499–513.
- 1189 14. Karn E, Jasieniuk M. Nucleotide diversity at site 106 of EPSPS in *Lolium perenne* L. ssp.  
1190 *multiflorum* from California indicates multiple evolutionary origins of herbicide resistance.  
1191 *Front Plant Sci.* 2017;8: 777.
- 1192 15. Herrmann KM, Weaver LM. The shikimate pathway. *Annu Rev Plant Physiol Plant Mol Biol.*

- 1193           annualreviews.org; 1999;50: 473–503.
- 1194   16. Cummins I, Wortley DJ, Sabbadin F, He Z, Coxon CR, Straker HE, et al. Key role for a  
1195       glutathione transferase in multiple-herbicide resistance in grass weeds. Proc Natl Acad Sci  
1196       U S A. 2013;110: 5812–5817.
- 1197   17. Kuester A, Wilson A, Chang S-M, Baucom RS. A resurrection experiment finds evidence of  
1198       both reduced genetic diversity and potential adaptive evolution in the agricultural weed  
1199       *Ipomoea purpurea*. Mol Ecol. 2016;25: 4508–4520.
- 1200   18. Debban CL, Okum S, Pieper KE, Wilson A, Baucom RS. An examination of fitness costs of  
1201       glyphosate resistance in the common morning glory, *Ipomoea purpurea*. Ecol Evol. Wiley  
1202       Online Library; 2015;5: 5284–5294.
- 1203   19. Baucom RS, Mauricio R. Constraints on the evolution of tolerance to herbicide in the  
1204       common morning glory: resistance and tolerance are mutually exclusive. Evolution.  
1205       2008;62: 2842–2854.
- 1206   20. Van Etten ML, Kuester A, Chang S-M, Baucom RS. Fitness costs of herbicide resistance  
1207       across natural populations of the common morning glory, *Ipomoea purpurea*. Evolution.  
1208       2016;70: 2199–2210.
- 1209   21. Gaines TA, Heap IM. Mutations in herbicide-resistant weeds to EPSP synthase inhibitors.  
1210       In: International Survey of Herbicide Resistant Weeds [Internet]. [cited 8 Oct 2017].  
1211       Available: <http://www.weedscience.com>
- 1212   22. Loutre C, Dixon DP, Brazier M, Slater M, Cole DJ, Edwards R. Isolation of a  
1213       glucosyltransferase from *Arabidopsis thaliana* active in the metabolism of the persistent  
1214       pollutant 3,4-dichloroaniline. Plant J. 2003;34: 485–493.
- 1215   23. Brazier-Hicks M, Edwards R. Functional importance of the family 1 glucosyltransferase  
1216       UGT72B1 in the metabolism of xenobiotics in *Arabidopsis thaliana*. Plant J. 2005;42: 556–  
1217       566.
- 1218   24. Hammerton JL. Environmental factors and susceptibility to herbicides. Weeds. Weed  
1219       Science Society of America; 1967;15: 330–336.
- 1220   25. Matzrafi M, Seiwert B, Reemtsma T, Rubin B, Peleg Z. Climate change increases the risk  
1221       of herbicide-resistant weeds due to enhanced detoxification. Planta. 2016;244: 1217–1227.
- 1222   26. Anderson DM, Swanton CJ, Hall JC, Mersey BG. The influence of temperature and relative  
1223       humidity on the efficacy of glufosinate-ammonium. Weed Res. Blackwell Publishing Ltd;  
1224       1993;33: 139–147.
- 1225   27. Robinson MA, Letarte J, Cowbrough MJ, Sikkema PH, Tardif FJ. Winter wheat (*Triticum*  
1226       *aestivum* L.) response to herbicides as affected by application timing and temperature. Can  
1227       J Plant Sci. Canadian Science Publishing; 2014;95: 325–333.
- 1228   28. Leslie T, Baucom RS. De novo assembly and annotation of the transcriptome of the  
1229       agricultural weed *Ipomoea purpurea* uncovers gene expression changes associated with  
1230       herbicide resistance. G3. 2014;4: 2035–2047.
- 1231   29. Hoshino A, Jayakumar V, Nitasaka E, Toyoda A, Noguchi H, Itoh T, et al. Genome

- 1232 sequence and analysis of the Japanese morning glory *Ipomoea nil*. *Nat Commun.* 2016;7:  
1233 13295.
- 1234 30. Tajima F. Statistical method for testing the neutral mutation hypothesis by DNA  
1235 polymorphism. *Genetics.* 1989;123: 585–595.
- 1236 31. Fay JC, Wu CI. Sequence divergence, functional constraint, and selection in protein  
1237 evolution. *Annu Rev Genomics Hum Genet.* 2003;4: 213–235.
- 1238 32. Weir BS, Cockerham CC. Estimating F-statistics for the analysis of population-structure.  
1239 *Evolution.* 1984;38: 1358–1370.
- 1240 33. Alvarado-Serrano DF, Van Etten ML, Chang S-M, Baucom RS. The relative contribution of  
1241 natural landscapes and human-mediated factors on the connectivity of a noxious invasive  
1242 weed. *Heredity.* 2019;122: 29–40.
- 1243 34. Gaines TA, Zhang WL, Wang DF, Bukun B, Chisholm ST, Shaner DL, et al. Gene  
1244 amplification confers glyphosate resistance in *Amaranthus palmeri*. *Proc Natl Acad Sci U S*  
1245 *A.* 2010;107: 1029–1034.
- 1246 35. Jugulam M, Nihues K, Godar AS, Koo D-H, Danilova T, Friebe B, et al. Tandem  
1247 Amplification of a Chromosomal Segment Harboring 5-Enolpyruvylshikimate-3-Phosphate  
1248 Synthase Locus Confers Glyphosate Resistance in *Kochia scoparia*. *Plant Physiol.*  
1249 2014;166: 1200.
- 1250 36. Nandula VK, Wright AA, Bond JA, Ray JD, Eubank TW, Molin WT. EPSPS amplification in  
1251 glyphosate-resistant spiny amaranth (*Amaranthus spinosus*): a case of gene transfer via  
1252 interspecific hybridization from glyphosate-resistant Palmer amaranth (*Amaranthus*  
1253 *palmeri*). *Pest Manag Sci.* Wiley Online Library; 2014;70: 1902–1909.
- 1254 37. Chatham LA, Bradley KW, Kruger GR, Martin JR, Owen MDK, Peterson DE, et al. A  
1255 Multistate Study of the Association Between Glyphosate Resistance and EPSPS Gene  
1256 Amplification in Waterhemp (*Amaranthus tuberculatus*). *Weed Sci.* Cambridge University  
1257 Press; 2015;63: 569–577.
- 1258 38. Kumar V, Jha P, Reichard N. Occurrence and Characterization of *Kochia* (*Kochia scoparia*)  
1259 Accessions with Resistance to Glyphosate in Montana. *Weed Technol.* 2014;28: 122–130.
- 1260 39. Anderson LK, Doyle GG, Brigham B, Carter J, Hooker KD, Lai A, et al. High-resolution  
1261 crossover maps for each bivalent of *Zea mays* using recombination nodules. *Genetics.*  
1262 2003;165: 849–865.
- 1263 40. Haupt W, Fischer TC, Winderl S, Fransz P, Torres-Ruiz RA. The centromere1 (CEN1)  
1264 region of *Arabidopsis thaliana*: architecture and functional impact of chromatin. *Plant J.*  
1265 2001;27: 285–296.
- 1266 41. Copenhaver GP, Browne WE, Preuss D. Assaying genome-wide recombination and  
1267 centromere functions with *Arabidopsis* tetrads. *Proc Natl Acad Sci U S A.* 1998;95: 247–  
1268 252.
- 1269 42. Stapley J, Feulner PGD, Johnston SE, Santure AW, Smadja CM. Variation in  
1270 recombination frequency and distribution across eukaryotes: patterns and processes.



- 1271 Philos Trans R Soc Lond B Biol Sci. 2017;372. doi:10.1098/rstb.2016.0455
- 1272 43. Messer PW, Petrov DA. Population genomics of rapid adaptation by soft selective sweeps.  
1273 Trends Ecol Evol. 2013;28: 659–669.
- 1274 44. Garud NR, Messer PW, Buzbas EO, Petrov DA. Recent selective sweeps in North  
1275 American *Drosophila melanogaster* show signatures of soft sweeps. PLoS Genet. 2015;11:  
1276 e1005004.
- 1277 45. Yuan JS, Tranel PJ, Stewart CN Jr. Non-target-site herbicide resistance: a family business.  
1278 Trends Plant Sci. Elsevier; 2007;12: 6–13.
- 1279 46. Nol N, Tsikou D, Eid M, Livieratos IC, Giannopolitis CN. Shikimate leaf disc assay for early  
1280 detection of glyphosate resistance in *Conyza canadensis* and relative transcript levels of  
1281 EPSPS and ABC transporter genes. Weed Res. Blackwell Publishing Ltd; 2012;52: 233–  
1282 241.
- 1283 47. Peng Y, Abercrombie LL, Yuan JS, Riggins CW, Sammons RD, Tranel PJ, et al.  
1284 Characterization of the horseweed (*Conyza canadensis*) transcriptome using GS-FLX 454  
1285 pyrosequencing and its application for expression analysis of candidate non-target  
1286 herbicide resistance genes. Pest Manag Sci. 2010;66: 1053–1062.
- 1287 48. Yuan JS, Abercrombie LLG, Cao Y, Halfhill MD, Zhou X, Peng Y, et al. Functional  
1288 genomics analysis of horseweed (*Conyza canadensis*) with special reference to the  
1289 evolution of non-target-site glyphosate resistance. Weed Sci. 2010;58: 109–117.
- 1290 49. Kuester A, Fall E, Chang S-M, Baucom RS. Shifts in outcrossing rates and changes to  
1291 floral traits are associated with the evolution of herbicide resistance in the common morning  
1292 glory. Ecol Lett. 2017;20: 41–49.
- 1293 50. Cummins I, Bryant DN, Edwards R. Safener responsiveness and multiple herbicide  
1294 resistance in the weed black-grass (*Alopecurus myosuroides*) [Internet]. Plant  
1295 Biotechnology Journal. 2009. pp. 807–820. doi:10.1111/j.1467-7652.2009.00445.x
- 1296 51. Cummins I, Cole DJ, Edwards R. A role for glutathione transferases functioning as  
1297 glutathione peroxidases in resistance to multiple herbicides in black-grass. Plant J. Wiley  
1298 Online Library; 1999;18: 285–292.
- 1299 52. Baucom RS. Evolutionary and ecological insights from herbicide-resistant weeds: what  
1300 have we learned about plant adaptation, and what is left to uncover? New Phytol. Wiley  
1301 Online Library; 2019; Available:  
1302 <https://nph.onlinelibrary.wiley.com/doi/abs/10.1111/nph.15723>
- 1303 53. Délye C, Jasieniuk M, Le Corre V. Deciphering the evolution of herbicide resistance in  
1304 weeds. Trends Genet. Elsevier Ltd; 2013;29: 649–658.
- 1305 54. Green P, Ewing B. Phred. Version 0.020425 c. Computer program and documentation  
1306 available at [www.phrap.org](http://www.phrap.org). 2002;
- 1307 55. Katoh K, Misawa K, Kuma K-I, Miyata T. MAFFT: a novel method for rapid multiple  
1308 sequence alignment based on fast Fourier transform. Nucleic Acids Res. Oxford Univ  
1309 Press; 2002;30: 3059–3066.

- 1310 56. Waterhouse AM, Procter JB, Martin DMA, Clamp M, Barton GJ. Jalview Version 2--a  
1311 multiple sequence alignment editor and analysis workbench. *Bioinformatics*. 2009;25:  
1312 1189–1191.
- 1313 57. Benjamini Y, Hochberg Y. Controlling the false discovery rate: a practical and powerful  
1314 approach to multiple testing. *J R Stat Soc Series B Stat Methodol*. [Royal Statistical  
1315 Society, Wiley]; 1995;57: 289–300.
- 1316 58. Jombart T, Ahmed I. adegenet 1.3-1: new tools for the analysis of genome-wide SNP data  
1317 [Internet]. *Bioinformatics*. 2011. doi:10.1093/bioinformatics/btr521
- 1318 59. Jombart T. adegenet: a R package for the multivariate analysis of genetic markers  
1319 [Internet]. *Bioinformatics*. 2008. pp. 1403–1405. doi:10.1093/bioinformatics/btn129
- 1320 60. Paradis E. pegas: an R package for population genetics with an integrated--modular  
1321 approach. *Bioinformatics*. 2010. pp. 419–420.
- 1322 61. Notredame C, Higgins DG, Heringa J. T-Coffee: A novel method for fast and accurate  
1323 multiple sequence alignment. *J Mol Biol*. Elsevier; 2000;302: 205–217.
- 1324 62. Bushnell B. BMap short read aligner. University of California, Berkeley, California URL  
1325 <http://sourceforge.net/projects/bbmap>. 2016;
- 1326 63. Li H, Handsaker B, Wysoker A, Fennell T, Ruan J, Homer N, et al. The Sequence  
1327 Alignment/Map format and SAMtools. *Bioinformatics*. 2009;25: 2078–2079.
- 1328 64. Danecek P, Auton A, Abecasis G, Albers CA, Banks E, DePristo MA, et al. The variant call  
1329 format and VCFtools. *Bioinformatics*. 2011;27: 2156–2158.
- 1330 65. Kamvar ZN, Tabima JF, Grünwald NJ. Poppr: an R package for genetic analysis of  
1331 populations with clonal, partially clonal, and/or sexual reproduction. *PeerJ*. 2014;2: e281.
- 1332 66. Goudet J. Hierfstat, a package for R to compute and test hierarchical F-statistics. *Mol Ecol*  
1333 *Resour*. Wiley Online Library; 2005;5: 184–186.
- 1334 67. Raj A, Stephens M, Pritchard JK. fastSTRUCTURE: variational inference of population  
1335 structure in large SNP data sets. *Genetics*. 2014;197: 573–589.
- 1336 68. Bradbury PJ, Zhang Z, Kroon DE, Casstevens TM, Ramdoss Y, Buckler ES. TASSEL:  
1337 software for association mapping of complex traits in diverse samples. *Bioinformatics*.  
1338 Oxford Univ Press; 2007;23: 2633–2635.
- 1339 69. Foll M, Gaggiotti O. A genome-scan method to identify selected loci appropriate for both  
1340 dominant and codominant markers: a Bayesian perspective. *Genetics*. *Genetics Soc*  
1341 *America*; 2008;180: 977–993.
- 1342 70. Coop G, Witonsky D, Di Rienzo A, Pritchard JK. Using environmental correlations to  
1343 identify loci underlying local adaptation. *Genetics*. 2010;185: 1411–1423.
- 1344 71. Günther T, Coop G. Robust identification of local adaptation from allele frequencies.  
1345 *Genetics*. 2013;195: 205–220.
- 1346 72. Matasci N, Hung L-H, Yan Z, Carpenter EJ, Wickett NJ, Mirarab S, et al. Data access for

- 1347 the 1,000 Plants (1KP) project. *Gigascience*. 2014;3: 17.
- 1348 73. Benazzo A, Panziera A, Bertorelle G. 4P: fast computing of population genetics statistics  
1349 from large DNA polymorphism panels. *Ecol Evol*. 2015;5: 172–175.
- 1350 74. Bolger AM, Lohse M, Usadel B. Trimmomatic: a flexible trimmer for Illumina sequence data.  
1351 *Bioinformatics*. Oxford Univ Press; 2014;30: 2114–2120.
- 1352 75. Simpson JT, Wong K, Jackman SD, Schein JE, Jones SJ, Birol I. ABySS: a parallel  
1353 assembler for short read sequence data. *Genome Res*. 2009;19: 1117–1123.
- 1354 76. Salmela L, Rivals E. LoRDEC: accurate and efficient long read error correction.  
1355 *Bioinformatics*. Oxford Univ Press; 2014;30: 3506–3514.
- 1356 77. Ye C, Hill C, Wu S, Ruan J, Zhanshan M. DBG2OLC: Efficient assembly of large genomes  
1357 using long erroneous reads of the third generation sequencing technologies. *Scientific*  
1358 *Reports*. 2016; 31900.
- 1359 78. Stanke M, Morgenstern B. AUGUSTUS: a web server for gene prediction in eukaryotes that  
1360 allows user-defined constraints. *Nucleic Acids Res*. Oxford Univ Press; 2005;33: W465–7.
- 1361 79. Solovyev V, Kosarev P, Seledsov I, Vorobyev D. Automatic annotation of eukaryotic genes,  
1362 pseudogenes and promoters. *Genome Biol*. [genomebiology.biomedcentral.com](http://genomebiology.biomedcentral.com); 2006;7  
1363 Suppl 1: S10.1–12.
- 1364 80. Bromberg Y, Rost B. SNAP: predict effect of non-synonymous polymorphisms on function.  
1365 *Nucleic Acids Res*. 2007;35: 3823–3835.
- 1366 81. Lowe TM, Eddy SR. tRNAscan-SE: a program for improved detection of transfer RNA  
1367 genes in genomic sequence. *Nucleic Acids Res*. Oxford Univ Press; 1997;25: 955–964.
- 1368 82. Altschul SF, Gish W, Miller W, Myers EW, Lipman DJ. Basic local alignment search tool. *J*  
1369 *Mol Biol*. 1990;215: 403–410.
- 1370 83. Hirakawa H, Okada Y, Tabuchi H, Shirasawa K, Watanabe A, Tsuruoka H, et al. Survey of  
1371 genome sequences in a wild sweet potato, *Ipomoea trifida* (H. B. K.) G. Don. *DNA Res*.  
1372 2015;22: 171–179.
- 1373 84. Kircher M, Sawyer S, Meyer M. Double indexing overcomes inaccuracies in multiplex  
1374 sequencing on the Illumina platform. *Nucleic Acids Res*. 2012;40: e3.
- 1375 85. Li D, Liu C-M, Luo R, Sadakane K, Lam T-W. MEGAHIT: an ultra-fast single-node solution  
1376 for large and complex metagenomics assembly via succinct de Bruijn graph. *Bioinformatics*.  
1377 2015;31: 1674–1676.
- 1378 86. Li H, Durbin R. Fast and accurate long-read alignment with Burrows–Wheeler transform.  
1379 *Bioinformatics*. Oxford University Press; 2010;26: 589–595.
- 1380 87. McKenna A, Hanna M, Banks E, Sivachenko A, Cibulskis K, Kernytsky A, et al. The  
1381 Genome Analysis Toolkit: a MapReduce framework for analyzing next-generation DNA  
1382 sequencing data. *Genome Res*. [genome.cshlp.org](http://genome.cshlp.org); 2010;20: 1297–1303.
- 1383 88. Van der Auwera GA, Carneiro MO, Hartl C, Poplin R, Del Angel G, Levy-Moonshine A, et

- 1384 al. From FastQ data to high confidence variant calls: the Genome Analysis Toolkit best  
1385 practices pipeline. *Curr Protoc Bioinformatics*. Wiley Online Library; 2013;43: 11.10.1–33.
- 1386 89. DePristo MA, Banks E, Poplin R, Garimella KV, Maguire JR, Hartl C, et al. A framework for  
1387 variation discovery and genotyping using next-generation DNA sequencing data. *Nat*  
1388 *Genet*. Nature Research; 2011;43: 491–498.
- 1389 90. Meynert AM, Bicknell LS, Hurler ME, Jackson AP, Taylor MS. Quantifying single nucleotide  
1390 variant detection sensitivity in exome sequencing. *BMC Bioinformatics*. 2013;14: 195.
- 1391 91. Verrier P, Theodoulou F, Murphy A. Download - TAIR 10 blastset  
1392 TAIR10\_cdna\_20101214\_updated. In: The Arabidopsis Information Resource [Internet].  
1393 2010 [cited 10 Oct 2016]. Available:  
1394 [https://www.arabidopsis.org/download\\_files/Sequences/TAIR10\\_blastsets/TAIR10\\_cdna\\_2](https://www.arabidopsis.org/download_files/Sequences/TAIR10_blastsets/TAIR10_cdna_20101214_updated)  
1395 [0101214\\_updated](https://www.arabidopsis.org/download_files/Sequences/TAIR10_blastsets/TAIR10_cdna_20101214_updated)
- 1396 92. Kent WJ. BLAT--the BLAST-like alignment tool. *Genome Res*. 2002;12: 656–664.
- 1397 93. Hinrichs AS, Karolchik D, Baertsch R, Barber GP, Bejerano G, Clawson H, et al. The UCSC  
1398 Genome Browser Database: update 2006. *Nucleic Acids Res*. 2006;34: D590–8.
- 1399 94. Vergara IA, Frech C, Chen N. CooVar: co-occurring variant analyzer. *BMC Res Notes*.  
1400 2012;5: 615.
- 1401 95. Weir BS. Genetic data analysis. Methods for discrete population genetic data. Sinauer  
1402 Associates, Inc. Publishers; 1990.
- 1403 96. Baduel P, Hunter B, Yeola S, Bomblies K. Genetic basis and evolution of rapid cycling in  
1404 railway populations of tetraploid *Arabidopsis arenosa*. *PLoS Genet*. 2018;14: e1007510.
- 1405 97. Paradis E, Schliep K. ape 5.0: an environment for modern phylogenetics and evolutionary  
1406 analyses in R. *Bioinformatics*. Oxford University Press; 2018;35: 526–528.
- 1407 98. Team RC. R Core Team. 2013. R: A language and environment for statistical computing. R  
1408 Foundation for Statistical Computing, Vienna, Austria. ISBN 3-900051-07-0, URL<  
1409 <http://www.R-project.org>; 2013.
- 1410 99. Bhatnagar SR, Yang Y, Khundrakpam B, Evans AC, Blanchette M, Bouchard L, et al. An  
1411 analytic approach for interpretable predictive models in high-dimensional data in the  
1412 presence of interactions with exposures [Internet]. *Genetic Epidemiology*. 2018. pp. 233–  
1413 249. doi:10.1002/gepi.22112
- 1414 100. Bilton TP, McEwan JC, Clarke SM, Brauning R, van Stijn TC, Rowe SJ, et al. Linkage  
1415 Disequilibrium Estimation in Low Coverage High-Throughput Sequencing Data. *Genetics*.  
1416 2018;209: 389–400.
- 1417 101. Lee KM, Coop G. Distinguishing Among Modes of Convergent Adaptation Using  
1418 Population Genomic Data. *Genetics*. 2017;207: 1591–1619.
- 1419 102. Bak S. Arabidopsis Cytochrome P450 List. In: The Arabidopsis Cytochrome P450,  
1420 Cytochrom b5, P450 Reductase, B-Glucosidase, and Glycosyltransferase Site [Internet].  
1421 2001 [cited 31 Mar 2017]. Available: [http://www.p450.kvl.dk/At\\_cyps/table.shtml](http://www.p450.kvl.dk/At_cyps/table.shtml)

- 1422 103. Lombard V, Golaconda RH, Drula E, Coutinho PM, Henrissat B. Arabidopsis thaliana  
1423 CAZY. In: Carbohydrate Active Enzymes database [Internet]. 1998 [cited 24 Mar 2017].  
1424 Available: <http://www.cazy.org/>
- 1425 104. Verrier P, Theodoulou F, Murphy A. Arabidopsis ABC Superfamily. In: The Arabidopsis  
1426 Information Resource [Internet]. 2008 [cited 31 Mar 2017]. Available:  
1427 [https://www.arabidopsis.org/browse/genefamily/ABC\\_merged.jsp](https://www.arabidopsis.org/browse/genefamily/ABC_merged.jsp)
- 1428 105. Vogt T, Jones P. Glycosyltransferases in plant natural product synthesis:  
1429 characterization of a supergene family. Trends Plant Sci. 2000;5: 380–386.
- 1430 106. Shannon P, Markiel A, Ozier O, Baliga NS, Wang JT, Ramage D, et al. Cytoscape: a  
1431 software environment for integrated models of biomolecular interaction networks. Genome  
1432 Res. genome.cshlp.org; 2003;13: 2498–2504.

1433  
1434  
1435  
1436  
1437  
1438  
1439  
1440  
1441  
1442  
1443  
1444

1445 **Supporting Information**

1446 **S1 Fig. No sequence differences in EPSPS.** Comparison of amino acid sequences of *Ipomoea*  
1447 *purpurea* EPSPS protein sequence (bottom two sequences) with other reported EPSPS proteins in the  
1448 NCBI database (gi|170783792, gi|76782198, gi|15225450, gi|257228989, gi|16751569, gi|460388790,  
1449 gi|225454012, gi|374923051, gi|46095337, gi|189170087) shows no sequence variation within the region  
1450 known to affect herbicide resistance (inside red outline). Non-synonymous changes (red and blue arrows)  
1451 outside of this region likewise do not correlate with resistance (Table S1).

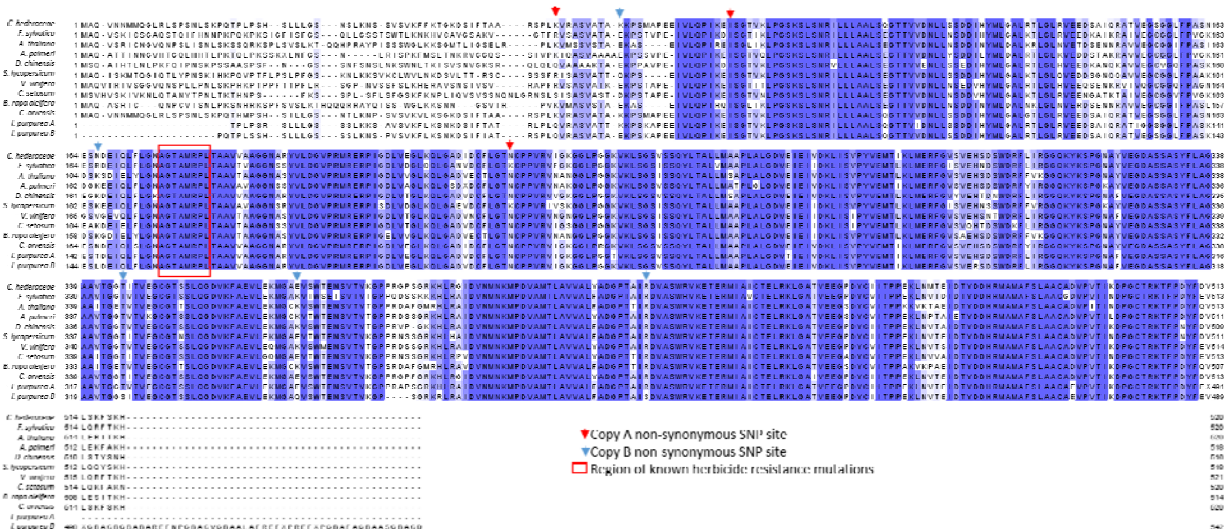

1452  
1453  
1454  
1455

1456 **S2 Fig. Neighbor joining tree using all of the RAD-seq SNP loci.** On the tree, populations are denoted  
1457 by color and tip labels; values at nodes are percent bootstrap support; population level resistance is  
1458 denoted by the color in the column (red=resistant, blue=susceptible).

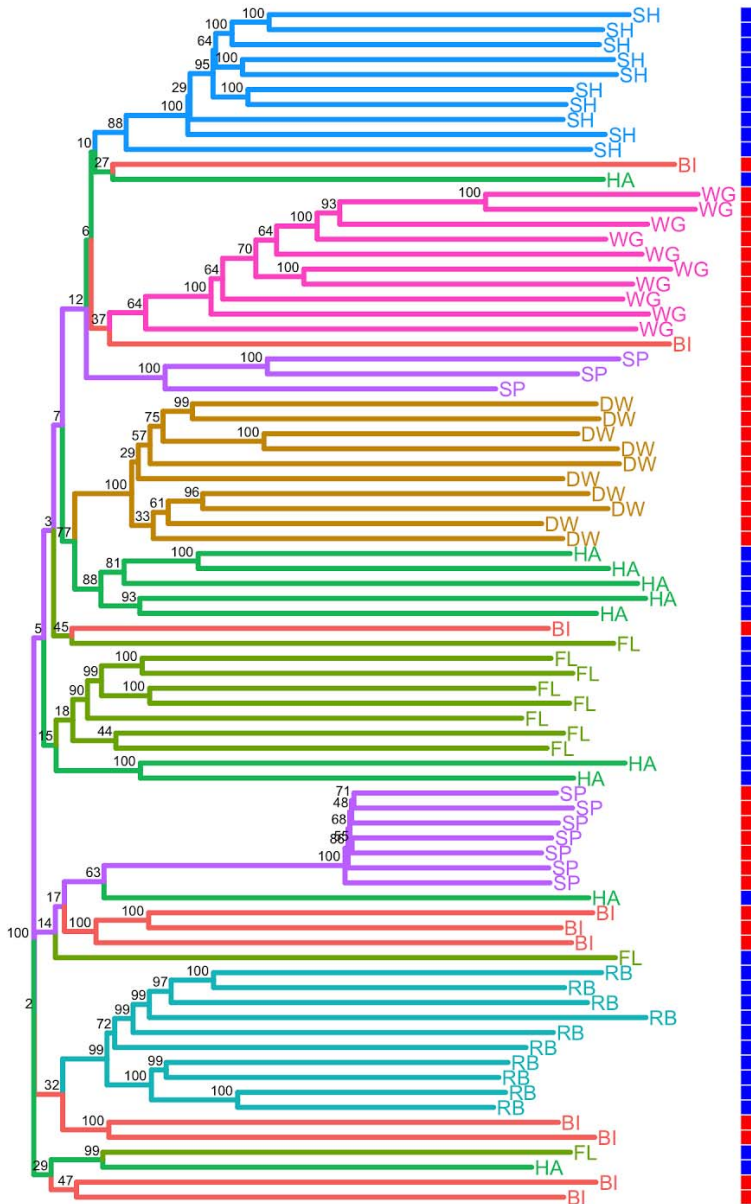

1459  
1460  
1461  
1462  
1463  
1464

1465 **S3 Fig. Population structure analyses.** At K=2 FastStructure results for the RADseq data do not show  
1466 the resistant populations (first four populations on the left) segregating into a distinct group, suggesting  
1467 they are not from a single origin. FastStructure analysis suggests either K=6 or K=7 as the best model,  
1468 both of which leads to some populations being highly admixed (e.g. BI) while others are fairly  
1469 homogenous (e.g. SH).

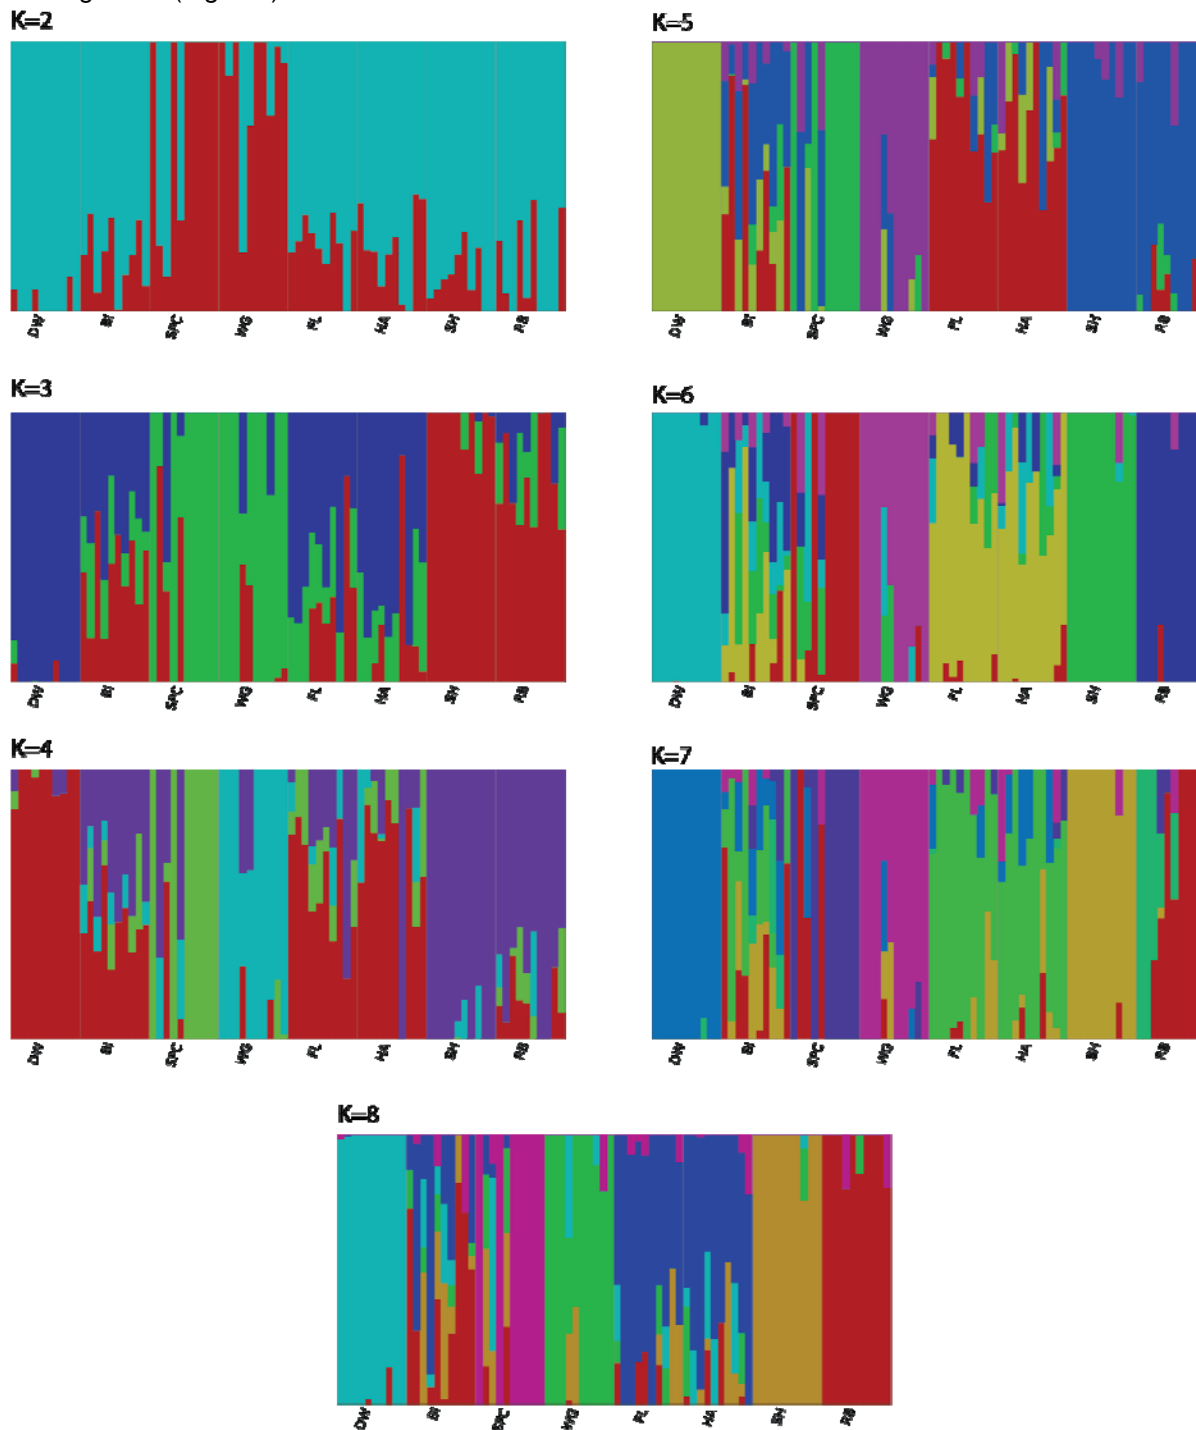

1470  
1471  
1472  
1473



1474  
1475  
1476  
1477  
1478  
1479  
1480  
1481

**S4 Fig. RADseq outliers associated with environmental variables.** Based on BayEnv2 analyses using environmental variables, we identified 50 loci that correlated with minimum temperature of coldest month, only 2 of which overlapped with the resistance outliers; 27 loci correlated with precipitation of the driest month, 0 of which overlapped with the resistance outliers; 36 loci correlated with elevation, 0 of which overlapped with the resistance outliers.

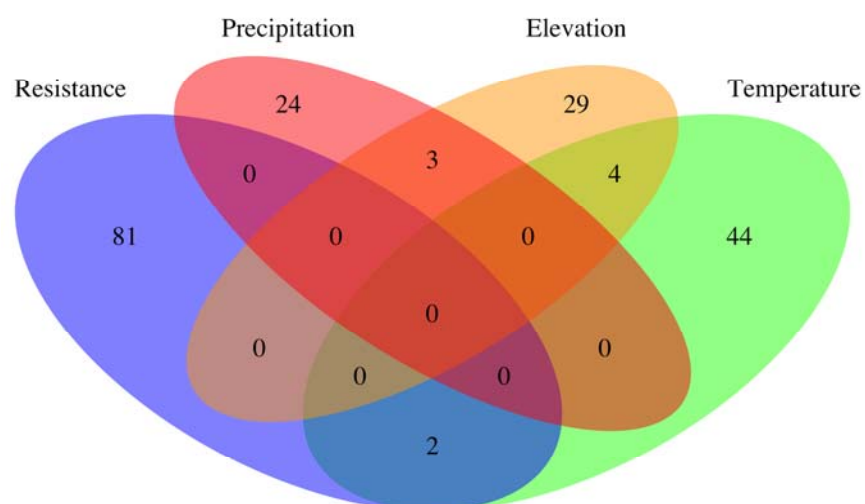

1482  
1483  
1484  
1485

1486 **S5 Fig. Differences between outliers inside and outside of outlier enriched regions. (A-D)**  
1487 Distributions of the number of genes within 4 mb of an outlier, either inside (blue) or outside (red) an  
1488 outlier-enriched region. For each type of gene, the outliers outside of the regions show a left-skewed  
1489 distribution indicating fewer close detoxification genes for (A) ABC transporters, (B) Glycosyltransferases,  
1490 (C) Cytochrome P450s and (D) Glutathione S-transferases. (E) Outliers outside of the regions have lower  
1491 frequencies of the resistant haplotype than those inside the regions, suggesting they are more population  
1492 specific.

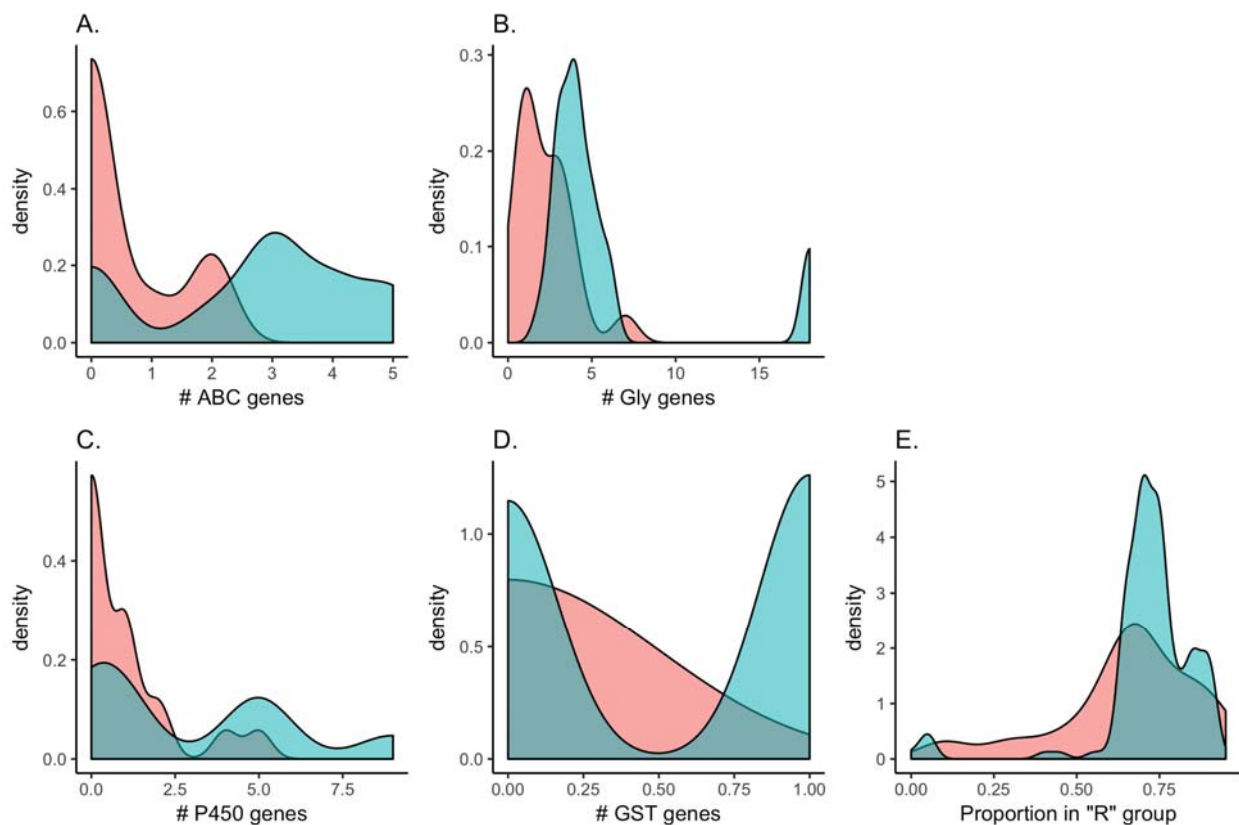

1493  
1494  
1495  
1496  
1497  
1498

**S6. Nucleotide diversity across all SNPs that aligned to the *I. nil* genome.** Data are shown are the ratio of susceptible to resistant individual nucleotide diversity. Grey bars indicate the outlier enriched regions identified on chromosomes 1, 6, 10, 13, and 15. Dashed lines show the 5% most extreme genome-wide values.

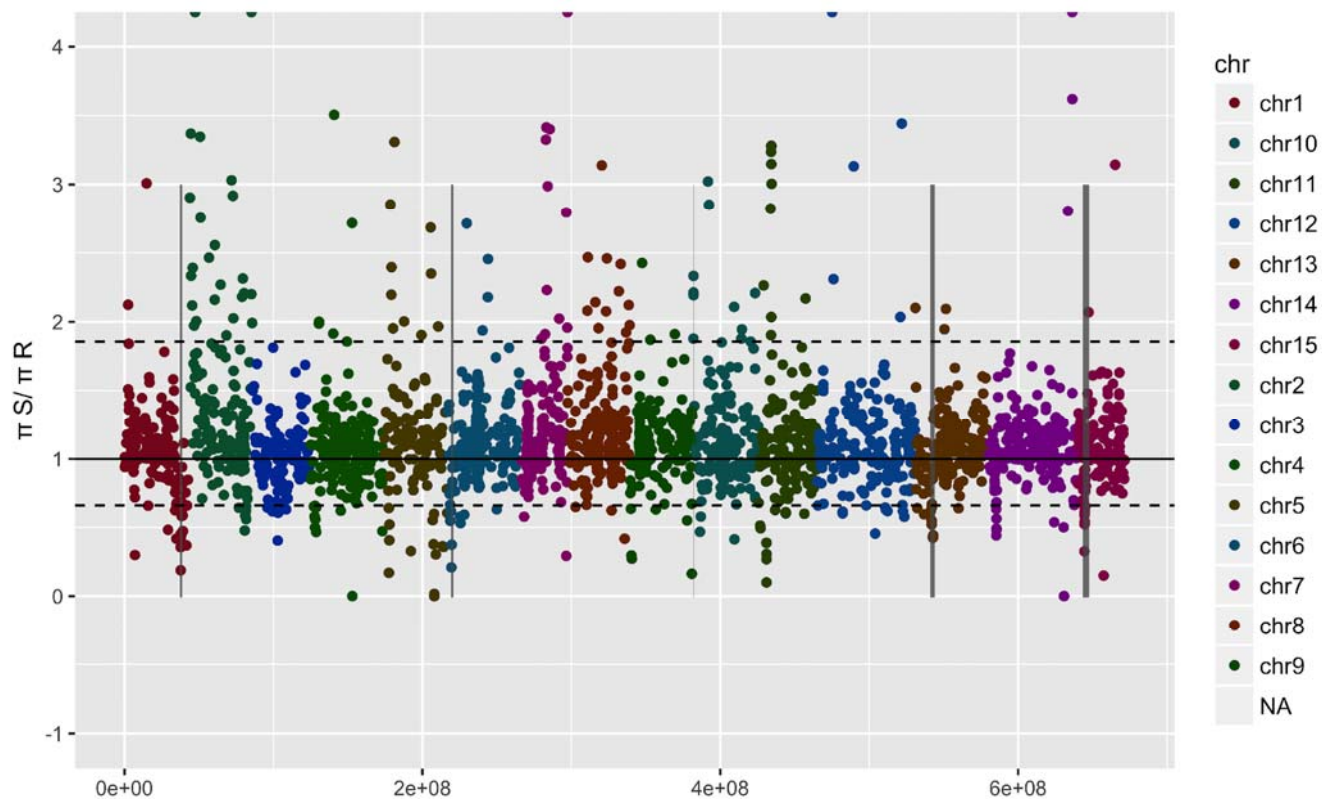

**S1 Table.** EPSPS SNP data for gene copy A and B. SNP #=the location of the SNP after alignment with EPSPS from *Convulvulus arvensis*, Ho=observed heterozygosity (across all samples), He=expected heterozygosity, HWE p-value=p-value for test of Hardy-Weinberg equilibrium from permutation test, Alleles=SNP alleles, Syn=whether a synonymous change (as determined by alignment with *C. arvensis* sequence), P-value chi-squared R vs S=p-value for test of allele frequency difference between resistant and susceptible populations, P-value cor with resistance=adjusted p-value for correlation with survival.

| SNP #          | Ho   | He   | HWE p-value | Alleles | Syn | P-value chi-squared R vs S | P-value cor with resistance |
|----------------|------|------|-------------|---------|-----|----------------------------|-----------------------------|
| <u>EPSPS A</u> |      |      |             |         |     |                            |                             |
| 102            | 0.19 | 0.47 | 0           | A:G     | Y   | 0.68                       | 0.20                        |
| 188            | 0.02 | 0.02 | 1           | A:G     | N   | 0.89                       | 0.45                        |
| 234            | 0.2  | 0.47 | 0           | C:G     | Y   | 0.68                       | 0.19                        |
| 247            | 0.2  | 0.47 | 0           | C:T     | Y   | 0.68                       | 0.19                        |
| 265            | 0.02 | 0.02 | 1           | A:G     | N   | 0.89                       | 0.45                        |
| 689            | 0.11 | 0.11 | 1           | A:T     | N   | 0.77                       | 0.12                        |
| 690            | 0.11 | 0.11 | 1           | C:A     | N   | 0.77                       | 0.12                        |
| 741            | 0.16 | 0.48 | 0           | G:A     | Y   | 0.64                       | 0.19                        |
| 831            | 0.18 | 0.47 | 0           | C:T     | Y   | 0.66                       | 0.19                        |
| 936            | 0.2  | 0.48 | 0           | T:C     | Y   | 0.66                       | 0.20                        |
| 1194           | 0.21 | 0.48 | 0.001       | T:C     | Y   | 0.69                       | 0.21                        |
| 1425           | 0.18 | 0.49 | 0           | A:G     | Y   | 0.67                       | 0.19                        |
| 1500           | 0.11 | 0.5  | 0           | T:G     | Y   | 0.57                       | 0.19                        |
| 1503           | 0.14 | 0.5  | 0           | T:C     | Y   | 0.62                       | 0.19                        |
| <u>EPSPS B</u> |      |      |             |         |     |                            |                             |
| 214            | 0.18 | 0.42 | 0.001       | G:A     | N   | 0.85                       | 0.59                        |
| 246            | 0.18 | 0.4  | 0           | T:G     | Y   | 0.84                       | 0.59                        |

|      |      |      |       |       |   |      |      |
|------|------|------|-------|-------|---|------|------|
| 372  | 0.18 | 0.42 | 0.001 | C:T   | Y | 0.80 | 0.59 |
| 496  | 0.18 | 0.42 | 0     | C:A   | N | 0.85 | 0.59 |
| 497  | 0.27 | 0.63 | 0     | T:C:G | N | 0.89 | 0.17 |
| 606  | 0.18 | 0.4  | 0.001 | T:G   | Y | 0.86 | 0.59 |
| 666  | 0.18 | 0.4  | 0     | T:C   | Y | 0.84 | 0.59 |
| 729  | 0.23 | 0.5  | 0.001 | T:A   | Y | 0.89 | 0.45 |
| 792  | 0.16 | 0.31 | 0.002 | C:T   | Y | 0.69 | 0.17 |
| 921  | 0.16 | 0.34 | 0.003 | C:T   | Y | 0.67 | 0.45 |
| 963  | 0.16 | 0.34 | 0.005 | C:T   | Y | 0.67 | 0.45 |
| 1029 | 0.3  | 0.49 | 0.01  | A:G   | Y | 1.00 | 0.45 |
| 1034 | 0.3  | 0.49 | 0.007 | G:C   | N | 1.00 | 0.45 |
| 1044 | 0.3  | 0.49 | 0.012 | T:C   | Y | 1.00 | 0.45 |
| 1053 | 0.18 | 0.35 | 0.002 | C:T   | Y | 0.67 | 0.17 |
| 1114 | 0.3  | 0.49 | 0.012 | C:G   | N | 0.98 | 0.45 |
| 1278 | 0.02 | 0.49 | 0     | T:A   | N | 0.97 | 0.48 |
| 1359 | 0.16 | 0.34 | 0.002 | C:G   | Y | 0.67 | 0.45 |
| 1392 | 0.3  | 0.49 | 0.011 | A:G   | Y | 1.00 | 0.45 |
| 1401 | 0.3  | 0.49 | 0.022 | G:A   | Y | 1.00 | 0.45 |
| 1413 | 0.16 | 0.34 | 0.001 | A:G   | Y | 0.67 | 0.45 |
| 1503 | 0.02 | 0.02 | 1     | C:T   | Y | 0.89 | 0.66 |

**S2 Table.** Population genetics parameters for the RADseq SNPs. Population = population abbreviation. Ave N/locus = average number of individuals with high quality allele data per locus. % loci missing = average percent of the population with missing data per locus. Ho = observed heterozygosity. He = expected heterozygosity. FIS = Wright's inbreeding coefficient.

| Population | Ave N/locus | % loci missing | Ho       | He       | FIS      |
|------------|-------------|----------------|----------|----------|----------|
| RB         | 9.518758    | 0.048124       | 0.239929 | 0.260012 | 0.101951 |
| HA         | 9.585627    | 0.041437       | 0.276958 | 0.325516 | 0.135513 |
| BI         | 9.223264    | 0.077674       | 0.282875 | 0.335554 | 0.151809 |
| DW         | 9.539342    | 0.046066       | 0.242219 | 0.267021 | 0.112749 |
| FL         | 9.610597    | 0.03894        | 0.278797 | 0.309048 | 0.107022 |
| SH         | 9.648599    | 0.03514        | 0.26598  | 0.247444 | -0.03845 |
| SPC        | 9.632156    | 0.036784       | 0.207493 | 0.222291 | 0.119612 |
| WG         | 9.488307    | 0.051169       | 0.209562 | 0.251296 | 0.209932 |

**S3 Table.** Assembly statistics for the Illumina genome assembly (using ABYSS-PE), the PacBio + Illumina genome assembly (using DBLOG2), the resequencing assembly (using Megahit) and the resequencing assembly contigs containing SNPs.

|                                | Illumina  | PacBio+Illumina | Denovo contigs | Denovo contigs with SNPs |
|--------------------------------|-----------|-----------------|----------------|--------------------------|
| Number of contigs              | 1933851   | 17897           | 67266          | 26988                    |
| Smallest contig                | 64        | 231             | 200            | 200                      |
| Largest Contig                 | 94914     | 162047          | 16167          | 16167                    |
| Number of bases                | 631125096 | 194706849       | 29298709       | 13126985                 |
| Mean contig length             | 237.49186 | 10879.30094     | 435.56         | 486.40                   |
| n_under_200                    | 1679726   | 0               | 0              | 0                        |
| Number of contigs over 1k      | 107943    | 17846           | 1456           | 832                      |
| Number of contigs over 10k     | 5686      | 6597            | 3              | 2                        |
| n90                            | 809       | 5106            | 268            | 301                      |
| n70                            | 2774      | 9988            | 363            | 415                      |
| n50                            | 6790      | 15425           | 458            | 530                      |
| n30                            | 23809     | 25478           | 592            | 668                      |
| n10                            | 94914     | 49505           | 908            | 975                      |
| gc%                            | 0.37927   | 0.38219         | 0.44           | 0.45                     |
| Number of bases that are N     | 361257    | 439633          | 0              | 0                        |
| Proportion of bases that are N | 0.00057   | 0.00226         | 0              | 0                        |

**S4 Table.** Summary of SNPs used in the analysis of linkage disequilibrium. Only SNPs that could be mapped to the genome of the close relative, *I. nil*, were used in analyses.  $r^2$  values were determined using all individuals regardless of population or resistance level.

| Chromosome | SNP Number | $r^2$ mean | SD    | $r^2$ 75% | $r^2$ within 10kb |
|------------|------------|------------|-------|-----------|-------------------|
| 1          | 1488       | 0.036      | 0.085 | 0.033     | 0.071±0.02        |
| 6          | 3191       | 0.032      | 0.077 | 0.031     | 0.038±0.001       |
| 10         | 1779       | 0.033      | 0.074 | 0.033     | 0.057±0.009       |
| 13         | 2011       | 0.034      | 0.077 | 0.034     | 0.039±0.004       |
| 15         | 1189       | 0.035      | 0.087 | 0.032     | 0.078±0.02        |

**S5 Table.** Summary of SNPs used in the analysis of linkage disequilibrium in the regions enriched for outliers, per chromosome, as identified by bayenv2 or Bayescan. Only SNPs that could be mapped to the genome of the close relative, *I. nil*, were used in analyses.  $r^2$  values were determined using all individuals regardless of population or resistance level.

| Chromosome | SNP Number | $r^2$ mean | SD    | $r^2$ 75% | Size of region with outliers | Size of region with high LD, $r^2 > 0.25$ |
|------------|------------|------------|-------|-----------|------------------------------|-------------------------------------------|
| 1          | 76         | 0.132      | 0.234 | 0.099     | 1.56MB                       | ~1MB                                      |
| 6          | 54         | 0.122      | 0.214 | 0.116     | 1.37MB                       | 0.84MB                                    |
| 10         | 46         | 0.234      | 0.292 | 0.359     | 276KB                        | 0.94MB                                    |
| 13         | 91         | 0.163      | 0.263 | 0.190     | 2.9MB                        | 1.55MB                                    |
| 15         | 195        | 0.125      | 0.248 | 0.062     | >4MB                         | ~3MB                                      |



**S6 Table.** Neutral F matrix from scaffolds on chromosomes 3, 7, and 14 (61 scaffolds total). BI, DW, SPC, and WG are the high resistance populations.

|     | BI    | DW    | SPC   | WG    | RB    | HA    | FL    | SH    |
|-----|-------|-------|-------|-------|-------|-------|-------|-------|
| BI  | 0.223 | 0.180 | 0.181 | 0.068 | 0.209 | 0.159 | 0.080 | 0.140 |
| DW  | 0.180 | 0.404 | 0.177 | 0.075 | 0.260 | 0.271 | 0.097 | 0.158 |
| SPC | 0.181 | 0.177 | 0.428 | 0.083 | 0.202 | 0.188 | 0.098 | 0.137 |
| WG  | 0.068 | 0.075 | 0.083 | 0.484 | 0.034 | 0.095 | 0.000 | 0.001 |
| RB  | 0.209 | 0.260 | 0.202 | 0.034 | 0.420 | 0.184 | 0.027 | 0.178 |
| HA  | 0.159 | 0.271 | 0.188 | 0.095 | 0.184 | 0.295 | 0.098 | 0.062 |
| FL  | 0.080 | 0.097 | 0.098 | 0.000 | 0.027 | 0.098 | 0.131 | 0.010 |
| SH  | 0.140 | 0.158 | 0.137 | 0.001 | 0.178 | 0.062 | 0.010 | 0.322 |

**S7 Table.** Parameter spaces for composite-likelihood calculations for the standing variation (s, t, g) and migration (s, m, source population) model simulations.

|                           |                                                                                                                                                                                                                                                                                                                           |
|---------------------------|---------------------------------------------------------------------------------------------------------------------------------------------------------------------------------------------------------------------------------------------------------------------------------------------------------------------------|
| Position of selected site | 37189, 37198, 37224, 37246, 37258, 37267, 37271, 37273, 37282, 37283, 37285, 37288, 37303, 37305, 37342, 37355, 37357, 37360, 37362, 37366, 37376, 37408, 140310, 140466, 140544, 140552, 140565, 140571, 140605, 140627                                                                                                  |
| s                         | 0.001, 0.002, 0.003, 0.004, 0.005, 0.006, 0.007, 0.008, 0.009, 0.01, 0.011, 0.014, 0.016, 0.019, 0.021, 0.024, 0.026, 0.029, 0.032, 0.034, 0.037, 0.039, 0.042, 0.045, 0.047, 0.05, 0.052, 0.055, 0.057, 0.06, 0.08, 0.1, 0.15, 0.2, 0.25, 0.3, 0.35, 0.4, 0.45, 0.5, 0.55, 0.6, 0.65, 0.7, 0.75, 0.8, 0.85, 0.9, 0.95, 1 |
| t                         | 5, 10, 81, 151, 222, 293, 364, 434, 505, 576, 646, 717, 788, 859, 929, 1000, 1500, 1607, 1714, 1821, 1929, 2036, 2143, 2250, 2357, 2464, 2571, 2679, 2786, 2893, 3000                                                                                                                                                     |
| g                         | $10^{-10}$ , $10^{-9}$ , $10^{-8}$ , $10^{-7}$ , $10^{-6}$ , $10^{-5}$ , $10^{-4}$ , $10^{-3}$ , $10^{-2}$                                                                                                                                                                                                                |
| m                         | $10^{-5}$ , $10^{-4}$ , $5^{-4}$ , 0.001, 0.005, 0.01, 0.1, 0.2, 0.3, 0.4, 0.5, 0.6, 0.7, 0.8, 0.9, 1                                                                                                                                                                                                                     |
| source population         | SPC and WG                                                                                                                                                                                                                                                                                                                |

**S1 Dataset:** Tables include annotations of outlier RADseq loci, annotations of probe sequences used for target capture probes, annotation of outlier contigs from resequencing, a list of *I. nil* genes within the 5 outlier enriched regions.

<https://docs.google.com/spreadsheets/d/1I59RoHSTc4ktXMOuZQuN5KNxMQ0Lprozqma8Cf3gBmA/edit?usp=sharing>
